# Supplementary material for: Substrate tolerance of the biosynthetic enzymes of glycosylated lanthipeptide NAI-112
Source: Royal Society of Chemistry journal article supplement (doi:10.1039/d0ob01215g), 2020-01-01
Supplement: d0ob01215g1.pdf [file d0ob01215g1.pdf]

## Supporting Information

### **Substrate Tolerance of the Biosynthetic Enzymes of Glycosylated Lanthipeptide NAI-112**

Wangjian Sheng, Bing Xu, Shaoming Chen, Yuqing Li, Bin Liu and Huan Wang\*

State Key Laboratory of Coordination Chemistry, Chemistry and Biomedicine Innovation Center,  
Jiangsu Key Laboratory of Advanced Organic Materials, School of Chemistry and Chemical  
Engineering, Nanjing University, Nanjing 210093, China

## General methods and materials

All oligonucleotides were purchased from Genscript Biotech (Nanjing, China). Restriction endonucleases and T4 DNA ligase were purchased from New England Biolabs (Ipswich, MA, USA). Phanta<sup>®</sup> Max Master Mix were purchased from Vazyme Biotech (Nanjing, China). Media components for bacterial cultures were purchased from Thermo Fisher (Waltham, MA, USA). Chemicals were purchased from Aladdin Reagent (Shanghai, China) or from Sigma-Aldrich (Schnelldorf, Germany) unless noted otherwise. Endoproteinase GluC was purchased from Roche Biosciences (Basel, Switzerland). *E. coli* DH5 $\alpha$  was used as host for cloning and plasmid propagation, and *E. coli* BL21 (DE3) was used as a host for expression of proteins and peptides.

All polymerase chain reactions (PCR) were carried out on a C1000 Touch<sup>™</sup> thermal cycler (Bio-Rad). DNA sequencing was performed by the Genscript Biotech, using appropriate primers. Matrix-assisted laser desorption/ionization time-of-flight mass spectrometry (MALDI-TOF MS) was carried out on Bruker UltraFlex<sup>™</sup> extreme. Liquid chromatography electrospray ionization tandem mass spectrometry (LC/ESI-MS/MS) was carried out and processed using a Triple TOF 4600 System (AB Sciex) equipped with a Prominence Ultra Fast Liquid Chromatography (UFLC) system (Shimadzu). UV-Vis spectrometry was conducted using Cary 300 (Agilent Technologies).

Conditions for all ESI-MS and MS/MS were set as follows: nebulizer gas: 55 psi; heater gas : 55 psi; curtain gas: 35 psi; drying temperature: 550 °C; ion spray voltage: 5500 V; declustering potential: 100 V; collision energy: 35 V (positive); collision energy spread: 10 V. The mass range and accumulation time are 400-4000 m/z, 250 ms for ESI-MS and 100-2000 m/z, 100 ms for MS/MS, respectively. Collision-induced dissociation (CID) was performed for fragmentation of the respective peptide ions. Calibration solutions purchased from AB SCIEX were used for instrument calibration, and high resolution was chosen in the ESI+ mode.

## General nomenclature

In this paper, we will use the standardized nomenclature recommended by the lanthipeptide community in 2013. This nomenclature numbers residues in the precursor peptides starting with the first residue of the core peptide. Residues in the leader peptide are indicated with negative numbers counting back from the junction between the leader peptide and core peptide.

## Primers used in this study

| Primer name                         | Sequence (5'-3')                                                         |
|-------------------------------------|--------------------------------------------------------------------------|
| AplA BamHI F                        | TGCTGGATCCAGTCCAGGAAATTCTGGAAGTCAAGAAC<br>TGCC                           |
| AplA HindIII R                      | TGCTAAGCTTTTAACAGTTGGACCAGGTAAAGGAACTCG<br>GCCAAC                        |
| AplA <sub>P11insW</sub> HindIII R   | GCTAAGCTTTTAACAGTTGGACCAGGTAAAGGAACTCG<br>GCCAACCCACGGGCAC               |
| AplA <sub>P11insAAA</sub> HindIII R | GCTAAGCTTTTAACAGTTGGACCAGGTAAAGGAACTCGG<br>CCAACCCGCGCCCGCCGGGCACGGGCTGC |
| AplA <sub>W13insAAA</sub> HindIII R | AGCTAAGCTTTTAACAGTTGGACCAGGTAAAGGAACTCG<br>GCGCCGCGCCCA                  |

|                                           |                                                                          |
|-------------------------------------------|--------------------------------------------------------------------------|
| AplA <sub>P11W-W13A</sub> HindIII R       | GCTAAGCTTTTAAACAGTTGGACCAGGTAAAGGAACTCGG<br>CGCACCCCAGCACGGGCTGCTAACAGAC |
| AplA <sub>W13C</sub> HindIII R            | GCTAAGCTTTTAAACAGTTGGACCAGGTAAAGGAACTCGG<br>GCAACCCGGGCACGGGCTGC         |
| AplA <sub>W13S</sub> HindIII R            | GCTAAGCTTTTAAACAGTTGGACCAGGTAAAGGAACTCGG<br>GCTACCCGGGCACGGGCTGC         |
| AplA <sub>W13R</sub> HindIII R            | GCTAAGCTTTTAAACAGTTGGACCAGGTAAAGGAACTCGG<br>ACGACCCGGGCACGGGCTGC         |
| AplA <sub>W13E</sub> HindIII R            | AAAAAGCTTTTAAACAGTTGGACCAGGTAAAGGAACTCGG<br>TTCACCCGGGCACGGGCTGC         |
| AplA <sub>T3A-S16A</sub> BamHI F          | ACTCGGCCAACCCGGGCACGGGCTGCTAACAGACAGCGC<br>GCTAACCAG                     |
| AplA <sub>T3A-S16A</sub> HindIII R        | ATCGAAGCTTTTAAACAGTTGGACCAGGTAAACGCACTCG<br>GCCAACCCGGGCAC               |
| LabA <sub>T18A</sub> HindIII R            | GCTAAGCTTTTAAACAGTTGGACCACGCAAAGGAACTCGG<br>CCAACCCG                     |
| LabA <sub>T18S</sub> HindIII R            | AGCTAAGCTTTTAAACAGTTGGACCAGCTAAAGGAACTCG<br>GCCAACCCG                    |
| AplA <sub>W19insA-S20insA</sub> HindIII R | AAAAAGCTTTTAAACAGTTGCGGAGGCCAGGTAAAGGA<br>ACTCGGCCAACCCGGGCACG           |
| AplA <sub>S20insA</sub> HindIII R         | AAAAAGCTTTTAAACAGTTGGCGGACCAGGTAAAGGAACT<br>CGGCCAACCCG                  |
| AplA <sub>C10A</sub> HindIII R            | TTAACAGTTGGACCAGGTAAAGGAACTCGGCCAACCCGG<br>CGCCGGGCTGCTAACAGACA          |
| AplA <sub>C22A</sub> HindIII R            | AGCTAAGCTTTTACGCGTTGGACCAGGTAAAGGAACTCG<br>GCCAAC                        |
| AplA <sub>P11A</sub> HindIII R            | TTAACAGTTGGACCAGGTAAAGGAACTCGGCCAACCCGC<br>GCACGGGCTGCTAACAGACA          |
| AplA <sub>P14A</sub> HindIII R            | AGCTAAGCTTTTAAACAGTTGGACCAGGTAAAGGAACTCG<br>CCCAACCCGGGCACGGGCTG         |
| AplA <sub>P11A-P14A</sub> HindIII R       | TTAACAGTTGGACCAGGTAAAGGAACTCGCCCAACCCGC<br>GCACGGGCTGCTAACAGACA          |
| AplG NdeI F                               | GCTCATATGCGCGTGCTGCTGTATTGCTACG                                          |
| AplG XhoI R                               | GCTCTCGAGTTAGCGATGGACCAGACGTTCCAGAACT                                    |
| AplKC NdeI F                              | AGCTCATATGGTTCTGGATACCCGTTATATTCGCTTTTGCC<br>GTC                         |
| AplKC XhoI R                              | AGCTCTCGAGTTATTCTTCAGAATCGGCACCCGCGGAG                                   |
| AplKC <sub>K63A</sub> F                   | CCGGAACAAGGTTGGGCAGTTCATCTGGCGTCC                                        |
| AplKC <sub>K63A</sub> R                   | GGACGCCAGATGAACTGCCAACCTTGTTCCGG                                         |
| AplKC <sub>H65A</sub> F                   | CAAGGTTGGAAAGTTGCTCTGGCGTCCACCCTG                                        |
| AplKC <sub>H65A</sub> R                   | CAGGGTGGACGCCAGAGCAACTTTCCAACCTTG                                        |
| AplKC <sub>Y120A</sub> F                  | GGTAAATTTATTACCATCGCCCCGCTGGACGAAGCC                                     |
| AplKC <sub>Y120A</sub> R                  | GGCTTCGTCCAGCGGGGCGATGGTAATAAATTTACC                                     |

|                             |                                    |
|-----------------------------|------------------------------------|
| AplKC <sub>K249A</sub> F    | GAACGTGTTGTCTGGCAGAAGCGCGTCCG      |
| AplKC <sub>K249A</sub> R    | CGGACGCGCTTCTGCCAGGACAACACGTTC     |
| AplKC <sub>D359A</sub> F    | GTCGTGCTGGGTGCGGTTCCGAAAAACATT     |
| AplKC <sub>D359A</sub> R    | AATGTTTTTCGGATGAACCGCACCCAGCACGAC  |
| AplKC <sub>N364A</sub> F    | GATGTTTCATCCGAAAGCCATTCTGCTGCGCGAT |
| AplKC <sub>N364A</sub> R    | ATCGCGCAGCAGAATGGCTTTCGGATGAACATC  |
| AplKC <sub>D376A</sub> F    | CAGCCGGTGTTTCATTGCGTTCGAATTTTCGGGT |
| AplKC <sub>D376A</sub> R    | ACCCGAAAATTCGAACGCAATGAACACCGGCTG  |
| AplG <sub>S10A-D13A</sub> F | TATTGCTACGGCGCCCGTGGTGCTGTTACGCCG  |
| AplG <sub>S10A-D13A</sub> R | CGGCTGAACAGCACCCAGGGCGCCGTAGCAATA  |
| AplG <sub>E358A</sub> F     | TGTCCGTTCCATCGTGCACAGGCCCAATGGT    |
| AplG <sub>E358A</sub> R     | ACCATGGGCCTGTGCACGATGGAACGGACA     |

### Molecular cloning of the *aplA*, *aplKC* and *aplG* genes

Plasmids containing target genes were synthesized by Genscript Biotech and PCR amplified by 30 cycles of denaturing (95 °C for 30 s), annealing (65 °C for 30 s), and extending (72 °C, 1 min/kb) using high fidelity Phanta® DNA Polymerase. Amplifications were confirmed by 2% agarose gel electrophoresis, and the PCR products were purified using an Omega Biotech Cycle Pure Kit. The target DNA fragment and pRSFDuet-1 vector were digested in separate reactions containing 1X NEB buffer (New England Biolabs) with selected pair of restriction enzymes for 2 h at 37 °C. The digested products were purified by agarose gel electrophoresis, and the DNA fragments were extracted from the gel using an Omega Biotech Gel Extraction Kit. The resulting DNA products were ligated at 16 °C for 12 h in 1X T4 DNA Ligase buffer with T4 DNA Ligase (0.7 U/ µL). *E. coli* DH5α cells were transformed with 2.5 µL of the ligation product by heat shock, and cells were plated on LB-kanamycin agar plates and grown for 15 h at 37 °C. Several colonies were picked and used to inoculate separate 5 mL cultures of LB-kanamycin medium. The cultures were grown at 37 °C for 12 h, and plasmids were isolated using an Omega Biotech Plasmid Mini Kit. The sequences of the resulting plasmid products were confirmed by DNA sequencing.

### Construction of plasmids for coexpression of His<sub>6</sub>-AplA, AplKC and AplG.

Amplification of the two genes was performed using high fidelity Phanta® DNA Polymerase following the protocol described above. Restriction digestions were performed with NdeI and XhoI endonucleases following standard protocol. The digested products of *aplA* and *aplKC* genes were purified by agarose gel electrophoresis and ligated with pRSFDuet-1 and pACYCDuet-1 vectors, respectively. The resulting DNA products were ligated at 16 °C for 12 h in 1X T4 DNA Ligase buffer with T4 DNA Ligase (0.7 U/ µL). *E. coli* DH5α cells were transformed with 2.5 µL of the ligation product by heat shock, and cells were plated on LB-kanamycin and LB-chloramphenicol agar plates and grown for 15 h at 37 °C. Several colonies were picked and used to inoculate separate 5 mL cultures of LB-kanamycin and LB-chloramphenicol medium. The cultures were grown at 37 °C for 12 h, and plasmids were isolated using an Omega Biotech Plasmid Mini Kit. The sequences of the resulting plasmid products were confirmed by DNA sequencing.

### Mutagenesis of AplKC, AplG and AplA

Mutagenesis of AplKC was carried out by two-stage protocol, starting with the generation of

primers using two parallel asymmetric PCRs, followed by an exponential whole-plasmid amplification. PCR amplified by 30 cycles of denaturing (95 °C for 30 s), annealing (65 °C for 30 s), and extending (72 °C, 1 min/kb) using high fidelity Phanta® DNA Polymerase. Amplifications were confirmed by 1% agarose gel electrophoresis, and the PCR products were purified using an Omega Biotech Cycle Pure Kit. The target DNA fragment was digested in reaction containing 1X NEB buffer (New England Biolabs) with DpnI for 3 h at 37 °C. *E. coli* DH5 $\alpha$  cells were transformed with 2.5  $\mu$ L of the digested product by heat shock, and cells were plated on LB- agar plates and grown for 15 h at 37 °C. Several colonies were picked and used to inoculate separate 5 mL cultures of LB-chloramphenicol medium. The cultures were grown at 37 °C for 12 h, and plasmids were isolated using an Omega Biotech Plasmid Mini Kit. The sequences of the resulting plasmid products were confirmed by DNA sequencing.

#### **Co-expression of AplKC with His<sub>6</sub>-AplA.**

*E. coli* BL21(DE3) cells were transformed with pRSFDuet-1-His<sub>6</sub>-AplA and pACYCDuet-1-AplKC plated on a Luria broth (LB) agar plate containing 50 mg/L of kanamycin and 35 mg/mL of chloramphenicol. A single colony was used to inoculate a 5 mL culture of LB supplemented with 50 mg/L of kanamycin and 35 mg/mL of chloramphenicol. The culture was grown at 37 °C for 12 h and was used to inoculate 4 L of LB containing 50 mg/L of kanamycin and 35 mg/mL of chloramphenicol. Cells were grown at 37 °C to OD<sub>600</sub>~0.6-0.8 before IPTG was added to a final concentration of 0.2 mM and the culture was incubated at 18 °C for additional 16 h before harvesting.

#### **Overexpression and purification of AplKC and AplG modified AplA peptide.**

*E. coli* BL21(DE3) cells were transformed with pRSFDuet-1-His<sub>6</sub>-AplA-AplG and pACYCDuet-1-AplKC and plated on a Luria broth (LB) agar plate containing 50 mg/L of kanamycin and 35 mg/L of chloramphenicol. A single colony was used to inoculate a 5 mL culture of LB supplemented with 50 mg/L of kanamycin and 35 mg/L of chloramphenicol at 37 °C for 12 h. The culture was used to inoculate 4 L of LB containing 50 mg/L of kanamycin and 35 mg/L of chloramphenicol. Cells were grown at 37 °C to OD<sub>600</sub>~0.6-0.8 before IPTG was added to a final concentration of 0.2 mM and the culture was incubated at 18 °C for another 16 h before harvesting.

#### **Purification of AplA peptides produced by co-expression**

Cell pellet was resuspended in 30 mL of start buffer (20 mM NaH<sub>2</sub>PO<sub>4</sub>, pH 7.5, 500 mM NaCl, 0.5 mM imidazole, 20% glycerol) and stored at -80 °C. The cell paste was suspended in start buffer and the suspension was sonicated on ice for 20 min to lyse the cells. Cell debris was removed by centrifugation at 23,700  $\times$ g for 30 min at 4 °C. The supernatant was discarded and the pellet containing the insoluble peptide was resuspended in 30 mL of start buffer. The sonication and centrifugation steps were repeated. Again the supernatant was discarded and the pellet was resuspended in 30 mL of buffer 1 (6 M guanidine HCl, 20 mM NaH<sub>2</sub>PO<sub>4</sub>, pH 7.5, 500 mM NaCl, 0.5 mM imidazole). The sample was sonicated and insoluble material was removed by centrifugation at 23,700  $\times$ g for 30 min at 4 °C, followed by filtration of the supernatant through a 0.45  $\mu$ m filter. The filtered sample was applied to a 5 mL HisTrap HP (GE Healthcare Life Sciences) immobilized metal affinity chromatography (IMAC) column previously charged with NiSO<sub>4</sub> and equilibrated in buffer 1. The column was washed with two column volumes of buffer 1, followed by two column volumes of buffer 2 (4 M guanidine HCl, 20 mM NaH<sub>2</sub>PO<sub>4</sub>, pH 7.5, 500 mM NaCl, 30 mM imidazole). The peptide was eluted with 1-2 column

volumes of elution buffer (4 M guanidine HCl, 20 mM NaH<sub>2</sub>PO<sub>4</sub> , pH 7.5, 500 mM NaCl, 1 M imidazole). The fractions were desalted using a ZipTipC<sub>18</sub> and analyzed by MALDI-TOF MS. The fractions containing the desired peptide were pooled and purified by preparative reverse-phase high-performance liquid chromatography (RP-HPLC) using a Waters Delta-pak™ C4 15 μm 300 Å 25 × 100 mm PrepPac® Cartridge. Solvents for the RP-HPLC were solvent A (0.1% TFA in water) and solvent B (0.086% TFA in 80% acetonitrile / 20% water). A gradient of 2-100% of solvent B was executed over 45 min at a flow rate of 8 mL/min, and peptides were detected by absorbance at 210 nm. The fractions were analyzed by MALDI-TOF MS. All the fractions containing the desired product were combined and the organic solvents were removed by rotary evaporation, followed by lyophilization. The product was kept at -80 °C for long-term storage.

| Strain                                                                            | Genome            | Glycosyltransferase |
|-----------------------------------------------------------------------------------|-------------------|---------------------|
| <i>Streptomyces albus</i> subsp. <i>albus</i> strain NRRL F-4371                  | NZ_LMZE01000299.1 | WP_060733177.1      |
| <i>Streptomyces</i> sp. NRRL F-2664                                               | NZ_JOFX01000007.1 | WP_030764500.1      |
| <i>Kitasatospora aureofaciens</i> strain NRRL B-2658                              | NZ_LGUY01000246.1 | WP_003981554.1      |
| <i>Streptomyces peucetius</i> strain NRRL WC-3868                                 | NZ_JOCK01000055.1 | WP_032916214.1      |
| <i>Pseudonocardia</i> sp. Ae168_Ps1                                               | NZ_MCIK01000001.1 | WP_075297995.1      |
| <i>Streptomyces rimosus</i> subsp. <i>rimosus</i> strain NRRL WC-3927             | NZ_JOBO01000038.1 | WP_033015994.1      |
| <i>Streptomyces rimosus</i> subsp. <i>rimosus</i> strain NRRL WC-3904             | NZ_JOCQ01000054.1 | WP_030673038.1      |
| <i>Streptomyces rimosus</i> subsp. <i>rimosus</i> ATCC 10970                      | NZ_ANSJ01000034.1 | WP_003981554.1      |
| <i>Streptomyces rimosus</i> subsp. <i>pseudoverticillatus</i> strain NRRL WC-3896 | NZ_LGCV01000431.1 | WP_053804725.1      |
| <i>Amycolatopsis albispora</i> strain WP1                                         | NZ_CP015163.1     | WP_162788447.1      |
|                                                                                   |                   | WP_113692533.1      |
| <i>Actinosynnema mirum</i> DSM 43827                                              | NC_013093.1       | WP_015803558.1      |
|                                                                                   |                   | WP_015803555.1      |
| <i>Actinosynnema pretiosum</i> subsp. <i>pretiosum</i> strain ATCC 31280          | NZ_CP029607.1     | WP_015803558.1      |
|                                                                                   |                   | WP_118947401.1      |
| <i>Streptomyces ruber</i> NRRL ISP-5378                                           | NZ_JOAQ01000001   | WP_051910126.1      |
|                                                                                   |                   | WP_030363693.1      |
| <i>Microbacterium</i> sp. SLBN-146                                                | VFMR01000001.1    | TQJ31151.1          |

**Table S1.** Putative lanthipeptide biosynthetic gene clusters with glycosyltransferases. The contig numbers of the gene clusters and the accession numbers of putative glycosyltransferases are provided.

A) Co-expression of AplA with AplKC and AplG in *E. coli*

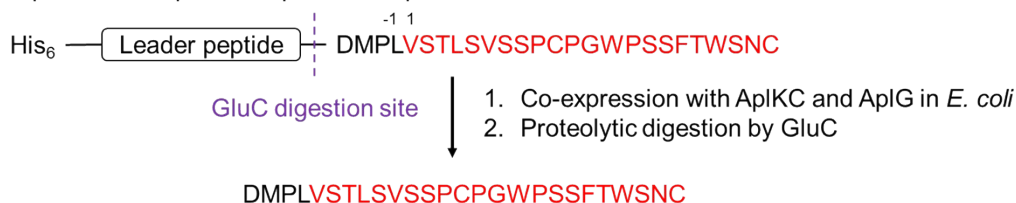

B) LC-MS analysis of the digestion products

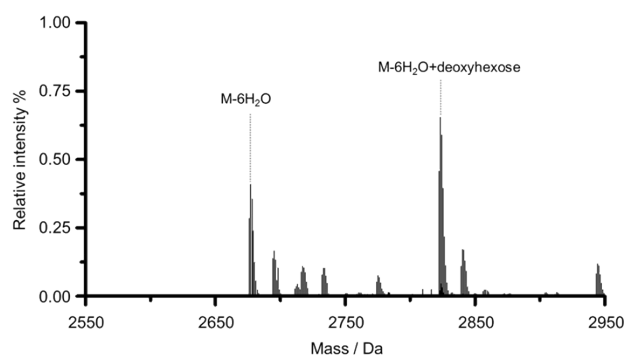

C) LC-MS/MS analysis of the [M-6H<sub>2</sub>O+deoxyhexose] segment

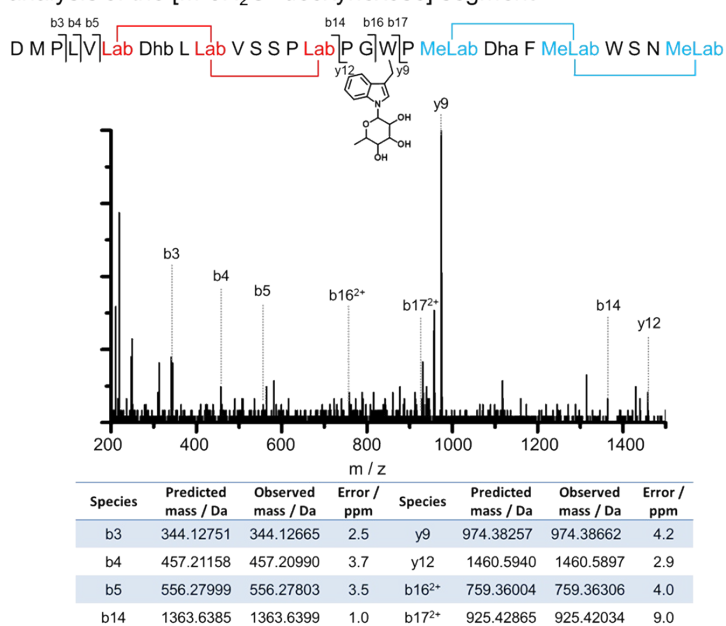

**Figure S1.** Co-expression of AplA with AplKC and AplG in *E. coli*. A) His<sub>6</sub>-tagged AplA was co-expressed with AplKC and AplG in *E. coli*, purified and digested by GluC. The reaction mixture was subjected to LC-MS analysis. Reaction conditions: 50 mM Tris HCl, pH 8.0, 100 μM AplA and 1 μM GluC at 37 °C for 12 h. B) LC-MS analysis of the AplKC, AplG modified AplA after GluC digestion. Deconvoluted mass of two derivatives: [M-6H<sub>2</sub>O], calc. 2676.1599, obs. 2676.1693; [M-6H<sub>2</sub>O+deoxyhexose], calc. 2822.2179, obs. 2822.2306. C) LC-MS/MS analysis of the [M-6H<sub>2</sub>O+deoxyhexose] segment. The b and y ions are listed in the table and marked in the spectrum. The amino acid of this peptide is shown on top.



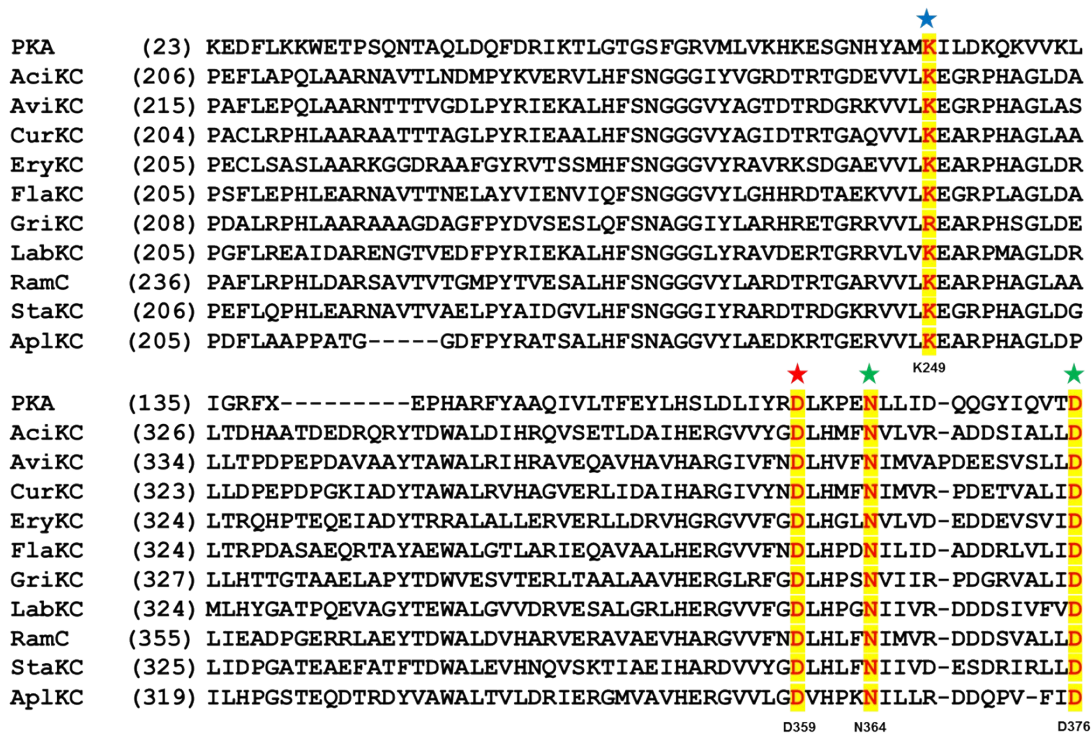

**Figure S2.** Sequence alignment of AplKC with Protein Kinase A and known class III lanthipeptide synthetases. The blue star indicates the amino acid that may interact with the  $\alpha$  and  $\beta$  phosphates of ATP. The red star indicates the amino acid that may direct the hydroxyl for attack on the  $\gamma$  phosphate of ATP. Cyan stars indicate amino acids that may chelate the  $Mg^{2+}$  in the active site of enzymes.

The accession numbers of listed proteins in GenBank are listed as follows: PKA (NP\_032880.1), AplKC (AHB63593.1), AciKC (WP\_015792832.1), AviKC (WP\_010988898.1), CruKC (WP\_012853928.1), EryKC (WP\_009949110.1), FlaKC (WP\_012920096.1), GriKC (WP\_012380882.1), LabKC (CAX48971.1), RamKC (NP\_630756.1), StaKC (WP\_013015817.1).

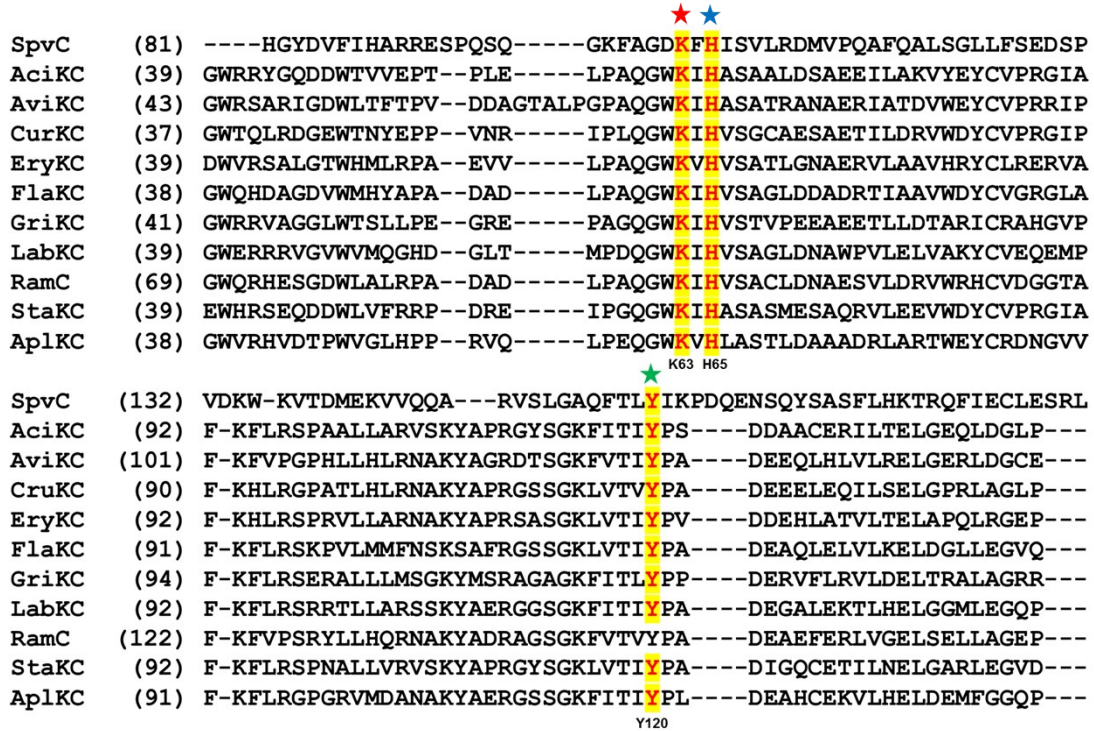

**Figure S3.** Sequence alignment of AplKC with phosphothreonine lyase SpvC and known class III lanthipeptide synthetases. The red star indicates the amino acid that may act as a general base to abstract the  $\alpha$  proton. The blue star indicates the amino acid may act as a general acid to facilitate cleavage of the C $\beta$ -OP bond. The cyan star indicates the amino acid that may act as a hydrogen bond acceptor.

The accession numbers of protein in GenBank are listed as follows: SpvC (WP\_001122242.1), AplKC (AHB63593.1), AciKC (WP\_015792832.1), AviKC (WP\_010988898.1), CruKC (WP\_012853928.1), EryKC (WP\_009949110.1), FlaKC (WP\_012920096.1), GriKC (WP\_012380882.1), LabKC (CAX48971.1), RamKC (NP\_630756.1), StaKC (WP\_013015817.1).

A) Co-expression of AplA with AplKC<sub>K249A</sub> in *E. coli*

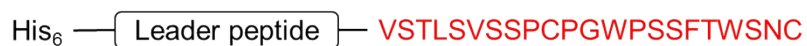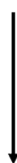

1. Co-expression with AplKC<sub>K249A</sub> in *E. coli*
2. LC-MS analysis

B) LC-MS analysis of the digestion products

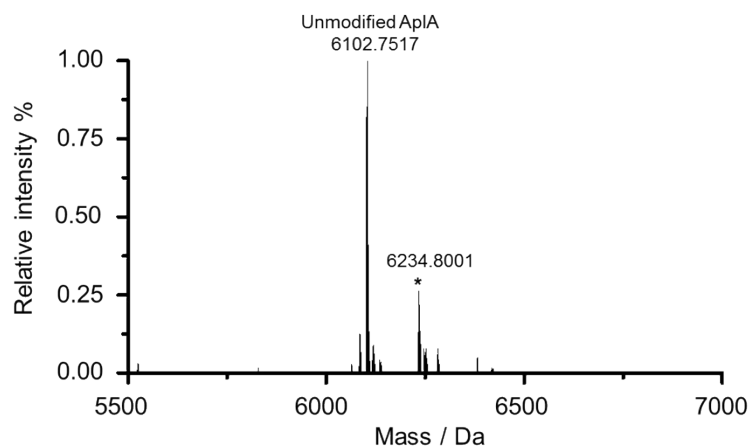

**Figure S4.** Co-expression of AplA with AplKC<sub>K249A</sub> in *E. coli*. A) His<sub>6</sub>-tagged AplA was co-expressed With AplKC<sub>K249A</sub> in *E. coli*. After purified the product was subjected to LC-MS analysis. B) HRMS analysis of the AplA product. Deconvoluted mass of one derivative: unmodified AplA, calc. 6102.7635, obs. 6102.7517. The peak marked with star does not match with any possible AplA product and may be produced by *E. coli*.

A) Co-expression of AplA with AplKC<sub>D359A</sub> in *E. coli*

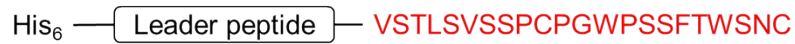

1. Co-expression with AplKC<sub>D359A</sub> in *E. coli*
2. LC-MS analysis

B) LC-MS analysis of the digestion products

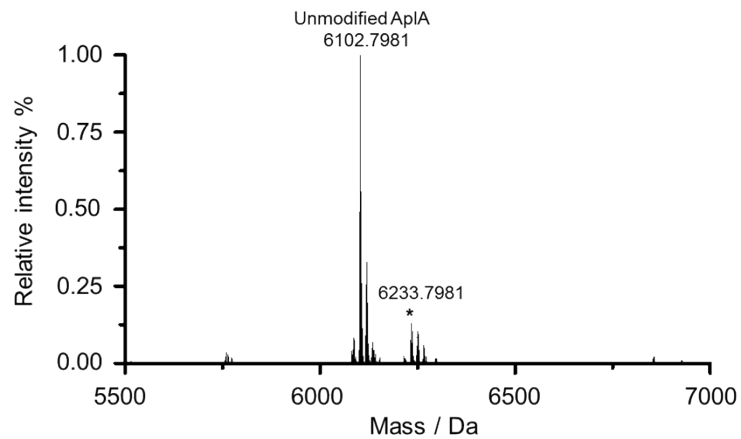

**Figure S5.** Co-expression of AplA with AplKC<sub>D359A</sub> in *E. coli*. A) His<sub>6</sub>-tagged AplA was co-expressed With AplKC<sub>D359A</sub> in *E. coli*. After purified the product was subjected to LC-MS analysis. B) HRMS analysis of AplA product. Deconvoluted mass of one derivative: unmodified AplA, calc. 6102.7635, obs. 6102.7981. The peak marked with star does not match with any possible AplA product and may be produced by *E. coli*.

A) Co-expression of AplA with AplKC<sub>N364A</sub> in *E. coli*

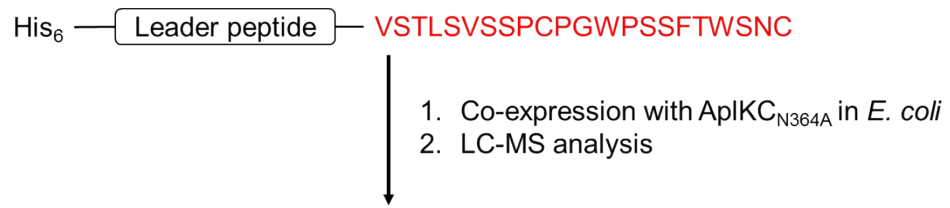

B) LC-MS analysis of the digestion products

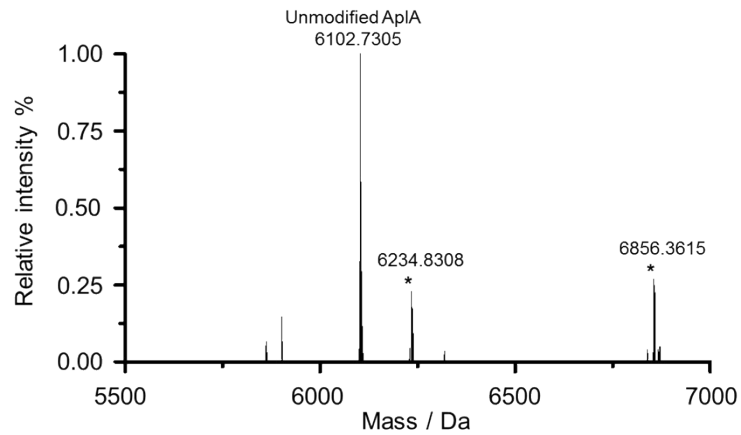

**Figure S6.** Co-expression of AplA with AplKC<sub>N364A</sub> in *E. coli*. A) His<sub>6</sub>-tagged AplA was co-expressed With AplKC<sub>N364A</sub> in *E. coli*. After purified the product was subjected to LC-MS analysis. B) HRMS analysis of AplA. Deconvoluted mass of one derivative: unmodified AplA, calc. 6102.7635, obs. 6102.7305. The peak marked with star does not match with any possible AplA product and may be produced by *E. coli*.

A) Co-expression of AplA with AplKC<sub>D376A</sub> in *E. coli*

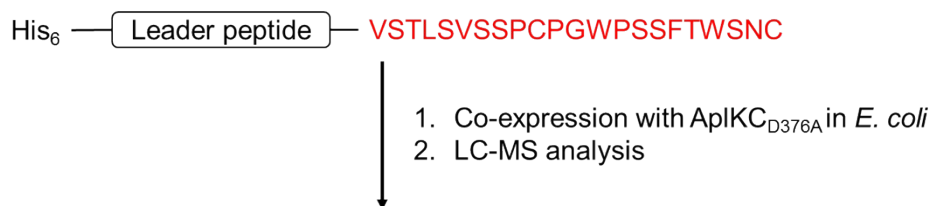

B) LC-MS analysis of the digestion products

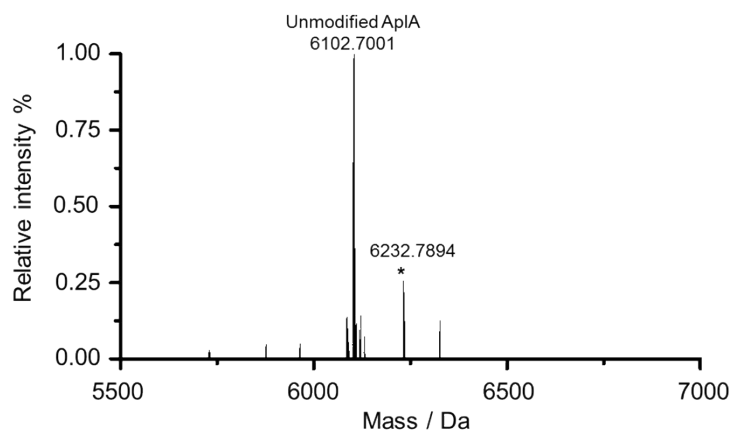

**Figure S7.** Co-expression of AplA with AplKC<sub>D376A</sub> in *E. coli*. A) His<sub>6</sub>-tagged AplA was co-expressed With AplKC<sub>D376A</sub> in *E. coli*. After purified the product was subjected to LC-MS analysis. B) HRMS analysis of AplA product. Deconvoluted mass of one derivative: unmodified AplA, calc. 6102.7635, obs. 6102.7001. The peak marked with star does not match with any possible AplA product and may be produced by *E. coli*.

A) Co-expression of AplA with AplKC<sub>K63A</sub> in *E. coli*

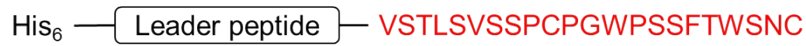

1. Co-expression with AplKC<sub>K63A</sub> in *E. coli*
2. LC-MS analysis

B) LC-MS analysis of the digestion products

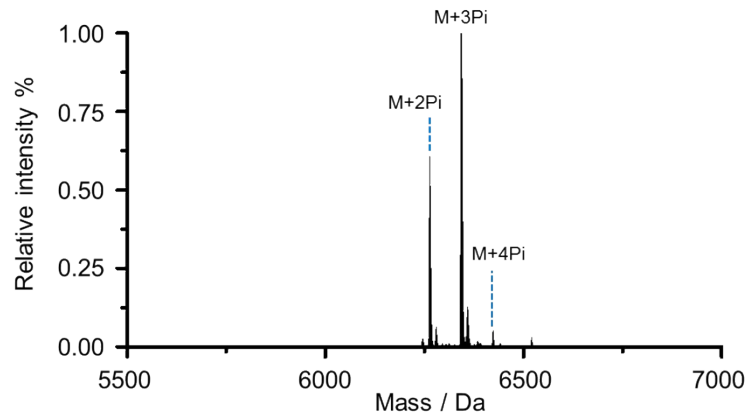

**Figure S8.** Co-expression of AplA with AplKC<sub>K63A</sub> in *E. coli*. A) His<sub>6</sub>-tagged AplA was co-expressed With AplKC<sub>K63A</sub> in *E. coli*. After purified the product was subjected to LC-MS analysis. B) HRMS analysis of AplA products. Deconvoluted mass of three derivatives: [M+2Pi], calc. 6262.6962, obs.6262.6092; [M+3Pi], calc. 6342.6625, obs. 6342.7368; [M+4Pi], calc. 6422.6288, obs. 6422.5968.

A) Co-expression of AplA with AplKC<sub>H65A</sub> in *E. coli*

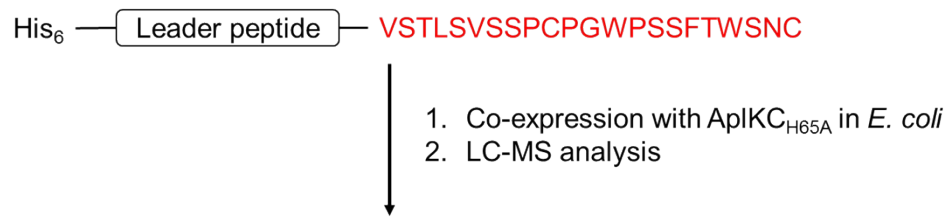

B) LC-MS analysis of the digestion products

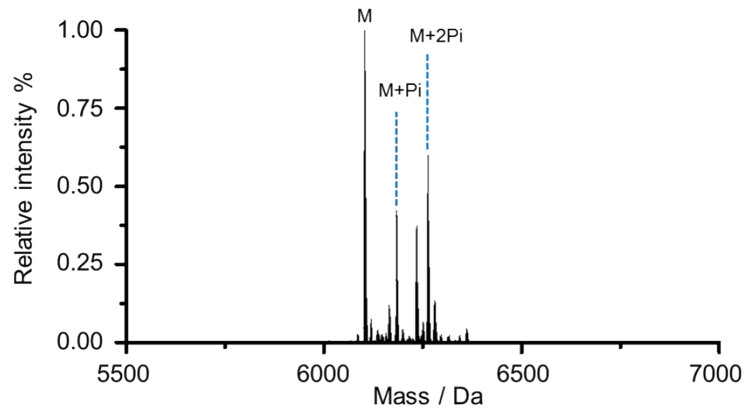

**Figure S9.** Co-expression of AplA with AplKC<sub>H65A</sub> in *E. coli*. A) His<sub>6</sub>-tagged AplA was co-expressed With AplKC<sub>H65A</sub> in *E. coli*. After purified the product was subjected to LC-MS analysis. B) HRMS analysis of AplA products. Deconvoluted mass of three derivatives: [M], calc. 6102.7635, obs. 6102.6738; [M+Pi], calc. 6182.7298, obs. 6182.6158; [M+2Pi], calc. 6262.6962, obs. 6262.5759.



A) Co-expression of AplA with AplKC<sub>Y120A</sub> in *E. coli*

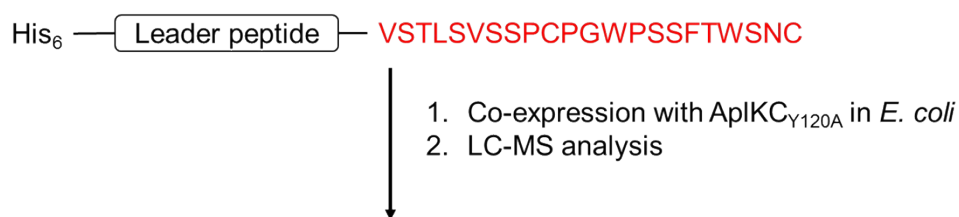

B) LC-MS analysis of the digestion products

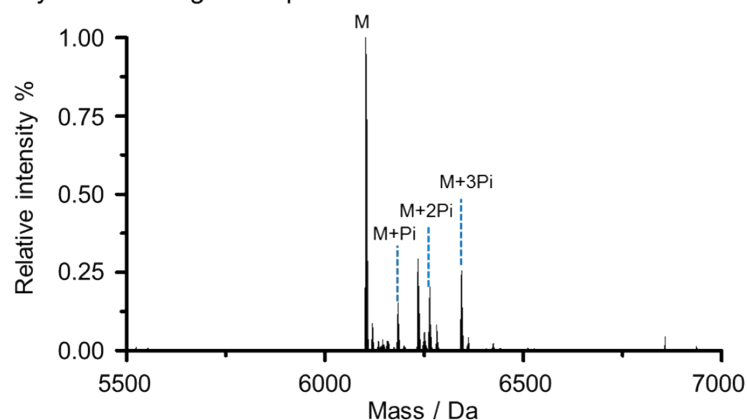

**Figure S10.** Co-expression of AplA with AplKC<sub>Y120A</sub> in *E. coli*. A) His<sub>6</sub>-tagged AplA was co-expressed With AplKC<sub>Y120A</sub> in *E. coli*. After purified the product was subjected to LC-MS analysis. B) HRMS analysis of AplA products. Deconvoluted mass of four derivatives: [M], calc. 6102.7635, obs. 6102.7096; [M+Pi], calc. 6182.7298, obs. 6182.7156; [M+2Pi], calc. 6262.6962, obs. 6262.6399; [M+3Pi], calc. 6342.6625, obs. 6342.6231.

A) Co-expression of AplA<sub>C10A</sub> with AplKC and AplG in *E. coli*

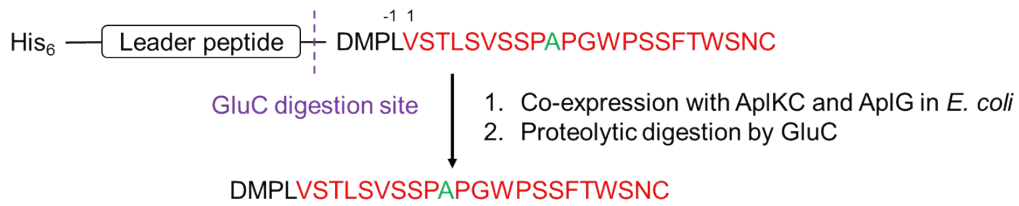

B) LC-MS analysis of the digestion products

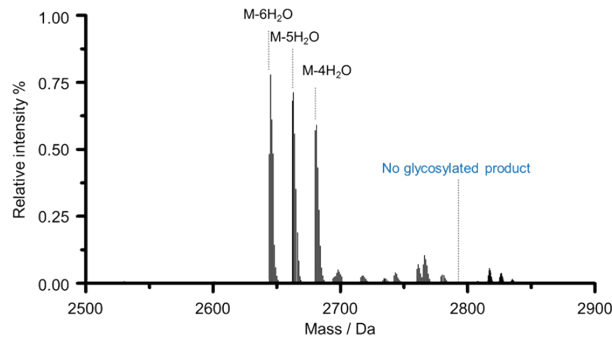

C) LC-MS/MS analysis of the [M-6H<sub>2</sub>O] segment

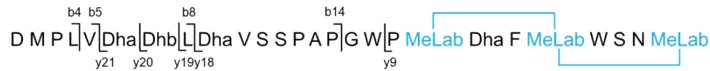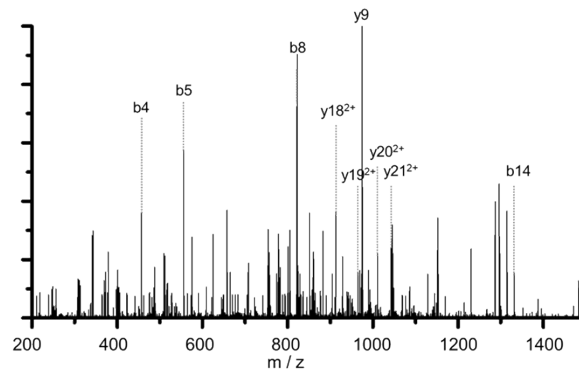

| Species | Predicted Mass / Da | Observed Mass / Da | Error / ppm | Species           | Predicted Mass / Da | Observed Mass / Da | Error / ppm |
|---------|---------------------|--------------------|-------------|-------------------|---------------------|--------------------|-------------|
| b4      | 457.21158           | 457.21425          | 5.8         | y18 <sup>2+</sup> | 912.89362           | 912.88960          | 4.4         |
| b5      | 556.27999           | 556.28092          | 1.7         | y19 <sup>2+</sup> | 969.43566           | 969.44040          | 4.9         |
| b8      | 821.42264           | 821.42880          | 7.5         | y20 <sup>2+</sup> | 1010.9542           | 1010.9589          | 4.6         |
| b14     | 1331.6665           | 1331.6710          | 3.4         | y21 <sup>2+</sup> | 1045.4649           | 1045.4713          | 6.1         |
| y9      | 974.38257           | 974.38988          | 7.5         |                   |                     |                    |             |

**Figure S11.** Co-expression of AplA<sub>C10A</sub> with AplKC and AplG in *E. coli*. A) His<sub>6</sub>-tagged AplA<sub>C10A</sub> was co-expressed with AplKC and AplG in *E. coli*, purified and digested by GluC. The reaction mixture was subjected to LC-MS analysis. Reaction conditions: 50 mM Tris HCl, pH 8.0, 100 μM AplA<sub>C10A</sub> and 1 μM GluC at 37 °C for 12 h. B) LC-MS analysis of the AplKC-AplG modified AplA<sub>C10A</sub> after GluC digestion. Deconvoluted mass of three derivatives: [M-6H<sub>2</sub>O], calc. 2644.1879, obs. 2644.2020; [M-5H<sub>2</sub>O], calc. 2662.1985, obs. 2662.2143; [M-4H<sub>2</sub>O], calc. 2680.2091, obs. 2680.2277. C) LC-MS/MS analysis of the [M-4H<sub>2</sub>O] segment. The *b* and *y* ions are listed in the table and marked in the spectrum. The amino acid sequence of the modified peptide is shown on top.

A) Co-expression of AplA<sub>C22A</sub> with AplKC and AplG in *E. coli*

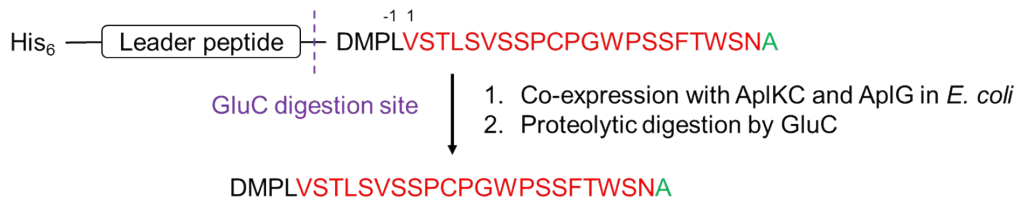

B) LC-MS analysis of the digestion products

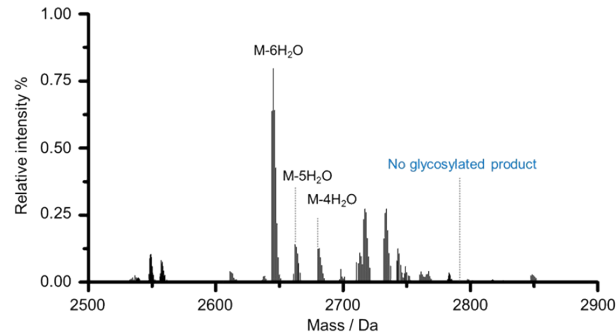

C) LC-MS/MS analysis of the [M-6H<sub>2</sub>O] segment

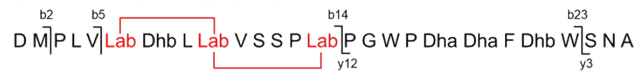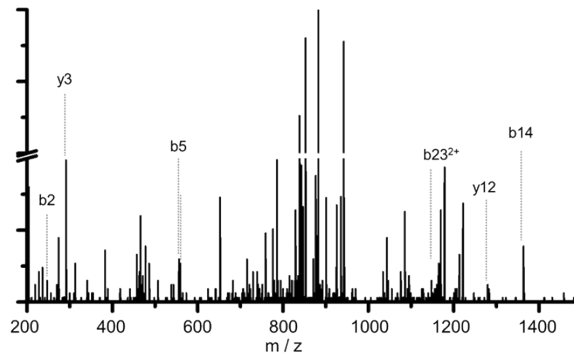

| Species | Predicted Mass / Da | Observed Mass / Da | Error / ppm | Species           | Predicted Mass / Da | Observed Mass / Da | Error / ppm |
|---------|---------------------|--------------------|-------------|-------------------|---------------------|--------------------|-------------|
| b2      | 247.07475           | 247.07619          | 5.8         | y3                | 291.12993           | 291.13023          | 1.0         |
| b5      | 556.27999           | 556.28304          | 5.5         | y12               | 1282.5640           | 1282.5655          | 1.2         |
| b14     | 1363.6385           | 1363.6424          | 2.9         | b23 <sup>2+</sup> | 1178.0400           | 1178.0488          | 7.7         |

**Figure S12.** Co-expression of AplA<sub>C22A</sub> with AplKC and AplG in *E. coli*. A) His<sub>6</sub>-tagged AplA<sub>C22A</sub> was co-expressed with AplKC and AplG in *E. coli*, purified and digested by GluC. The reaction mixture was subjected to LC-MS analysis. Reaction conditions: 50 mM Tris HCl, pH 8.0, 100 μM AplA<sub>C22A</sub> and 1 μM GluC at 37 °C for 12 h. B) LC-MS analysis of the AplKC, AplG modified AplA<sub>C22A</sub> after GluC digestion. Deconvoluted mass of three derivatives: [M-6H<sub>2</sub>O], calc. 2644.1879, obs. 2644.1799; [M-5H<sub>2</sub>O], calc. 2662.1985, obs. 2662.1914; [M-4H<sub>2</sub>O], calc. 2680.2091, obs. 2680.1841. C) LC-MS/MS analysis of the [M-6H<sub>2</sub>O] segment. The *b* and *y* ions are listed in the table and marked in the spectrum. The amino acid sequence of the modified peptide is shown on top.

A) Co-expression of AplA<sub>T18S</sub> with AplKC and AplG in *E. coli*

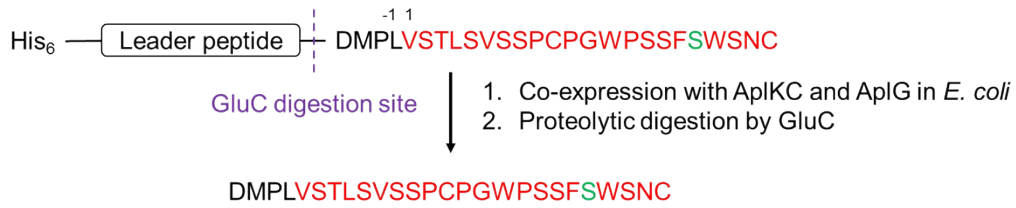

B) LC-MS analysis of the digestion products

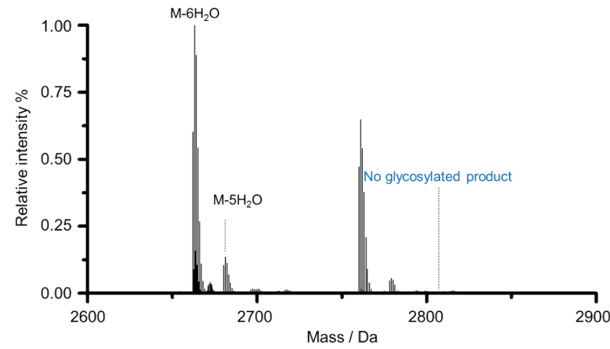

C) LC-MS/MS analysis of the [M-6H<sub>2</sub>O] segment

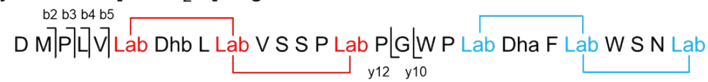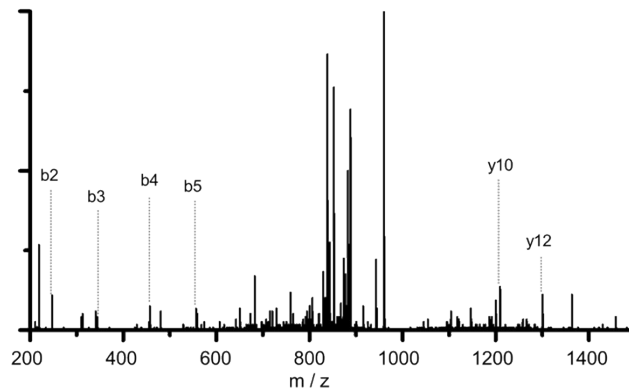

| Species | Predicted Mass / Da | Observed Mass / Da | Error / ppm | Species | Predicted Mass / Da | Observed Mass / Da | Error / ppm |
|---------|---------------------|--------------------|-------------|---------|---------------------|--------------------|-------------|
| b2      | 247.07475           | 247.07498          | 0.9         | b5      | 556.27999           | 556.28238          | 4.3         |
| b3      | 344.12751           | 344.12699          | 1.5         | y10     | 1146.4462           | 1146.4536          | 6.5         |
| b4      | 457.21158           | 457.20936          | 4.9         | y12     | 1300.5205           | 1300.5126          | 6.1         |

**Figure S13.** Co-expression of AplA<sub>T18S</sub> with AplKC and AplG in *E. coli*. A) His<sub>6</sub>-tagged AplA<sub>T18S</sub> was co-expressed with AplKC and AplG in *E. coli*, purified and digested by GluC. The reaction mixture was subjected to LC-MS analysis. Reaction conditions: 50 mM Tris HCl, pH 8.0, 100 μM AplA<sub>T18S</sub> and 1 μM GluC at 37 °C for 12 h. B) LC-MS analysis of the AplKC, AplG modified AplA<sub>T18S</sub> after GluC digestion. Deconvoluted mass of two derivatives: [M-6H<sub>2</sub>O], calc. 2662.1443, obs. 2662.1815; [M-5H<sub>2</sub>O], calc. 2680.1549, obs. 2680.1942. C) LC-MS/MS analysis of the [M-6H<sub>2</sub>O] segment. The *b* and *y* ions are listed in the table and marked in the spectrum. The amino acid sequence of the modified peptide is shown on top.

A) Co-expression of AplA<sub>T3A-S16A</sub> with AplKC and AplG in *E. coli*

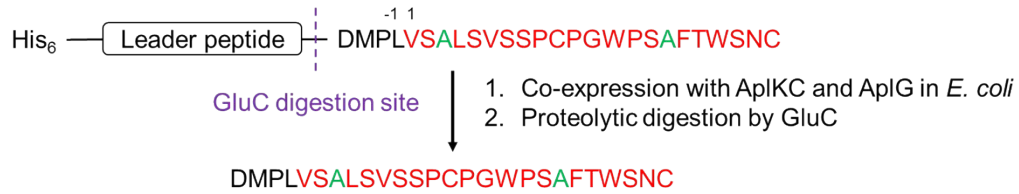

B) LC-MS analysis of the digestion products

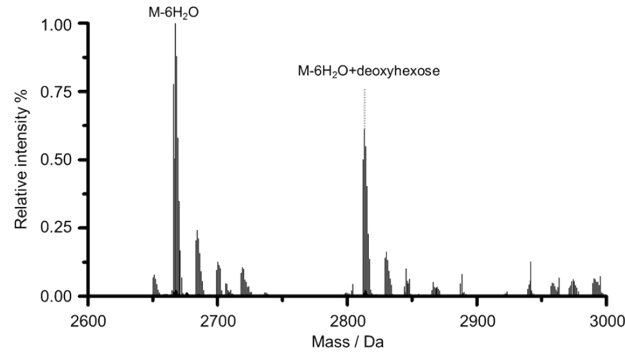

C) LC-MS/MS analysis of the [M-4H<sub>2</sub>O+deoxyhexose] segment

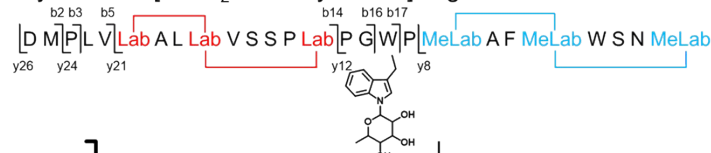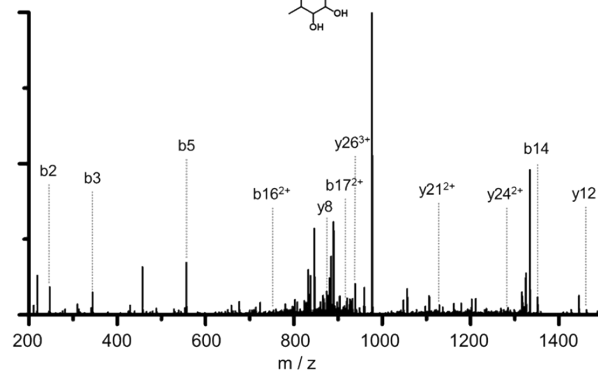

| Species | Predicted Mass / Da | Observed Mass / Da | Error / ppm | Species           | Predicted Mass / Da | Observed Mass / Da | Error / ppm |
|---------|---------------------|--------------------|-------------|-------------------|---------------------|--------------------|-------------|
| b2      | 247.07475           | 247.07544          | 2.8         | b16 <sup>2+</sup> | 753.36004           | 753.36186          | 2.4         |
| b3      | 344.12751           | 344.12784          | 1.0         | b17 <sup>2+</sup> | 919.42865           | 919.43208          | 3.7         |
| b5      | 556.27999           | 556.28101          | 1.8         | y21 <sup>2+</sup> | 1129.4878           | 1129.4885          | 0.6         |
| b14     | 1351.6385           | 1351.6401          | 1.2         | y24 <sup>2+</sup> | 1284.0904           | 1284.0876          | 2.2         |
| y8      | 879.34545           | 879.34946          | 4.6         | y26 <sup>3+</sup> | 938.41850           | 938.41750          | 1.0         |
| y12     | 1462.6097           | 1462.6143          | 3.1         |                   |                     |                    |             |

**Figure S14.** Co-expression of AplA<sub>T3A-S16A</sub> with AplKC and AplG in *E. coli*. A) His<sub>6</sub>-tagged AplA<sub>T3A-S16A</sub> was co-expressed with AplKC and AplG in *E. coli*, purified and digested by GluC. The reaction mixture was subjected to LC-MS analysis. Reaction conditions: 50 mM Tris HCl, pH 8.0, 100 μM AplA<sub>T3A-S16A</sub> and 1 μM GluC at 37 °C for 12 h. B) LC-MS analysis of the AplKC AplG modified AplA<sub>T3A-S16A</sub> after GluC digestion. Deconvoluted mass of two derivatives: [M-4H<sub>2</sub>O], calc. 2666.1755, obs. 2666.1873; [M-4H<sub>2</sub>O+deoxyhexose], calc. 2812.2335, obs. 2812.2443. C) LC-MS/MS analysis of the [M-4H<sub>2</sub>O+deoxyhexose] segment. The *b* and *y* ions are listed in the table and marked in the spectrum. The amino acid sequence of the modified peptide is shown on top.

A) Co-expression of AplA<sub>S20insA</sub> with AplKC and AplG in *E. coli*

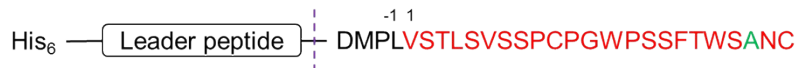

GluC digestion site

1. Co-expression with AplKC and AplG in *E. coli*
2. Proteolytic digestion by GluC

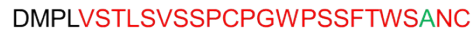

B) LC-MS analysis of the digestion products

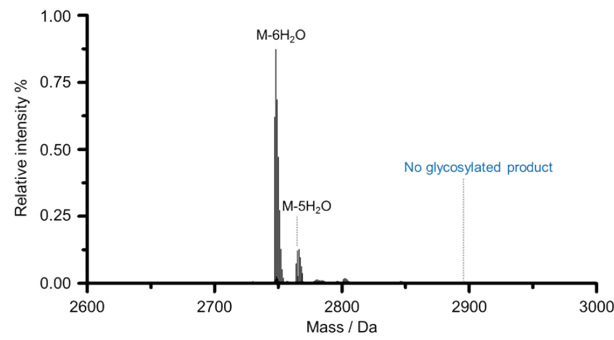

C) LC-MS/MS analysis of the [M-6H<sub>2</sub>O] segment

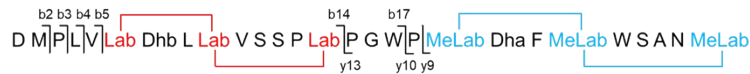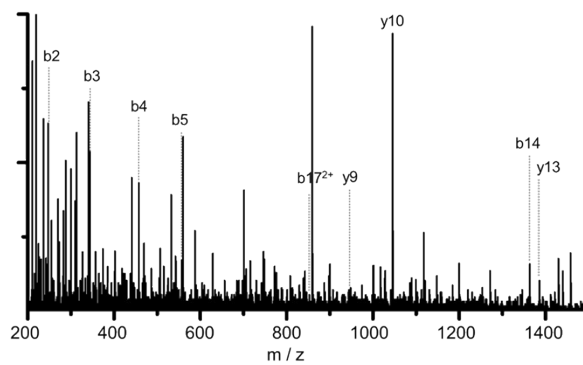

| Species | Predicted Mass / Da | Observed Mass / Da | Error / ppm | Species           | Predicted Mass / Da | Observed Mass / Da | Error / ppm |
|---------|---------------------|--------------------|-------------|-------------------|---------------------|--------------------|-------------|
| b2      | 247.07475           | 247.07453          | 0.9         | y9                | 948.36692           | 948.36698          | 0.1         |
| b3      | 344.12751           | 344.12726          | 0.7         | y10               | 1045.4197           | 1045.4242          | 4.3         |
| b4      | 457.21158           | 457.21130          | 0.6         | y13               | 1385.5732           | 1385.5799          | 4.8         |
| b5      | 556.27999           | 556.27627          | 6.7         | b17 <sup>2+</sup> | 852.39969           | 852.40561          | 6.9         |
| b14     | 1363.6385           | 1363.6319          | 4.8         |                   |                     |                    |             |

**Figure S15.** Co-expression of AplA<sub>S20insA</sub> with AplKC and AplG in *E. coli*. A) His<sub>6</sub>-tagged AplA<sub>S20insA</sub> was co-expressed with AplKC and AplG in *E. coli*, purified and digested by GluC. The reaction mixture was subjected to LC-MS analysis. Reaction conditions: 50 mM Tris HCl, pH 8.0, 100 μM AplA<sub>S20insA</sub> and 1 μM GluC at 37 °C for 12 h. B) LC-MS analysis of the AplKC, AplG modified AplA<sub>S20insA</sub> after GluC digestion. Deconvoluted mass of two derivatives: [M-6H<sub>2</sub>O], calc. 2747.1970, obs. 2747.2007; [M-5H<sub>2</sub>O], calc. 2765.2076, obs. 2765.2071. C) LC-MS/MS analysis of the [M-6H<sub>2</sub>O] segment. The *b* and *y* ions are listed in the table and marked in the spectrum. The amino acid sequence of the modified peptide is shown on top.

A) Co-expression of AplA<sub>W19insA-S20insA</sub> with AplKC and AplG in *E. coli*

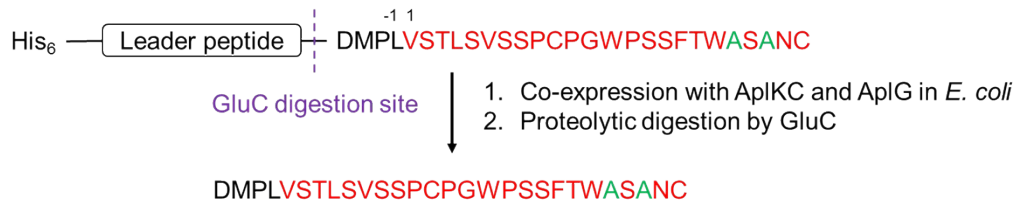

B) LC-MS analysis of the digestion products

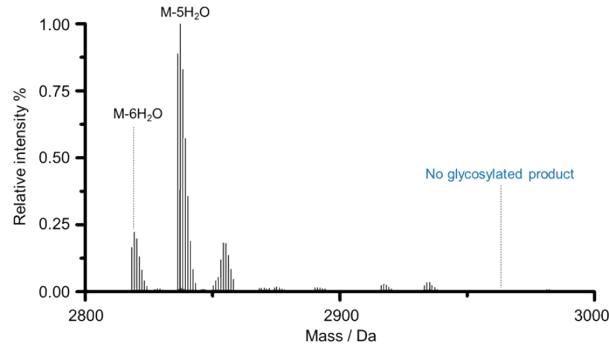

C) LC-MS/MS analysis of the [M-6H<sub>2</sub>O] segment

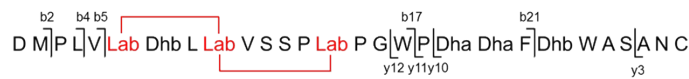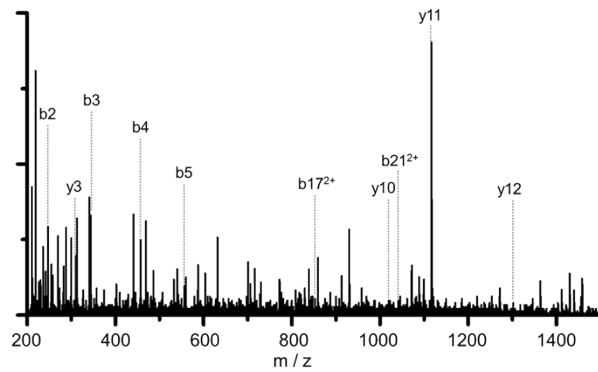

| Species | Predicted Mass / Da | Observed Mass / Da | Error / ppm | Species           | Predicted Mass / Da | Observed Mass / Da | Error / ppm |
|---------|---------------------|--------------------|-------------|-------------------|---------------------|--------------------|-------------|
| b2      | 247.07475           | 247.07430          | 1.8         | y11               | 1116.4568           | 1116.4579          | 1.0         |
| b4      | 457.21158           | 457.21320          | 3.5         | y12               | 1302.5361           | 1302.5376          | 1.2         |
| b5      | 556.27999           | 556.28322          | 5.8         | b17 <sup>2+</sup> | 852.39969           | 852.40389          | 4.9         |
| y3      | 307.10711           | 307.10529          | 5.9         | b21 <sup>2+</sup> | 1043.4818           | 1043.4849          | 3.0         |
| y10     | 1019.4040           | 1019.4010          | 2.9         |                   |                     |                    |             |

**Figure S16.** Co-expression of AplA<sub>W19insA-S20insA</sub> with AplKC and AplG in *E. coli*. A) His<sub>6</sub>-tagged AplA<sub>W19insA-S20insA</sub> was co-expressed with AplKC and AplG in *E. coli*, purified and digested by GluC. The reaction mixture was subjected to LC-MS analysis. Reaction conditions: 50 mM Tris HCl, pH 8.0, 100 μM AplA<sub>W19insA-S20insA</sub> and 1 μM GluC at 37 °C for 12 h. B) LC-MS analysis of the AplKC, AplG modified AplA<sub>W19insA-S20insA</sub> after GluC digestion. Deconvoluted mass of two derivatives: [M-6H<sub>2</sub>O], calc. 2818.2342, obs. 2818.2564; [M-5H<sub>2</sub>O], calc. 2836.2448, obs. 2836.2694. C) LC-MS/MS analysis of the [M-6H<sub>2</sub>O] segment. The *b* and *y* ions are listed in the table and marked in the spectrum. The amino acid sequence of the modified peptide is shown on top.

A) Co-expression of AplA<sub>P11A</sub> with AplKC and AplG in *E. coli*

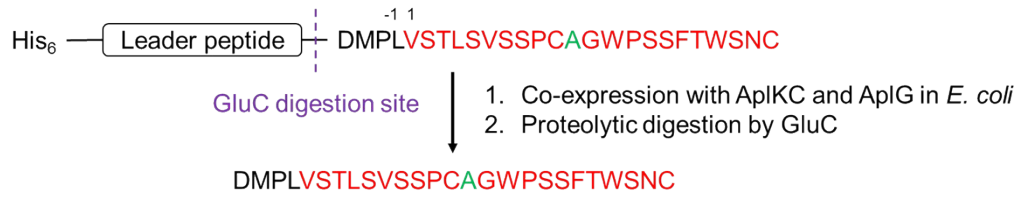

B) MALDI-TOF MS analysis of the digestion products

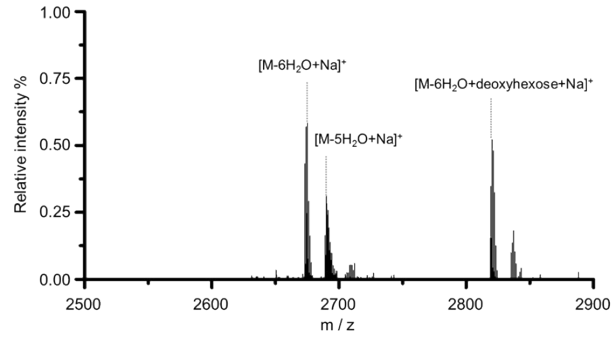

**Figure S17.** Co-expression of AplA<sub>P11A</sub> with AplKC and AplG in *E. coli*. A) His<sub>6</sub>-tagged AplA<sub>P11A</sub> was co-expressed with AplKC and AplG in *E. coli*, purified and digested by GluC. The reaction mixture was subjected to MALDI-TOF MS analysis. Reaction conditions: 50 mM Tris HCl, pH 8.0, 100 μM AplA<sub>P11A</sub> and 1 μM GluC at 37 °C for 12 h. B) MALDI-TOF MS analysis of the AplKC modified AplA<sub>P11A</sub> after GluC digestion. Deconvoluted mass of three derivatives: [M-6H<sub>2</sub>O+Na]<sup>+</sup>, calc. 2673.1243, obs. 2673.1880; [M-5H<sub>2</sub>O+Na]<sup>+</sup>, calc. 2691.1349, obs. 2691.2000. [M-6H<sub>2</sub>O+deoxyhexose+Na]<sup>+</sup>, calc. 2819.1825, obs. 2819.2420.



A) Co-expression of AplA<sub>P14A</sub> with AplKC and AplG in *E. coli*

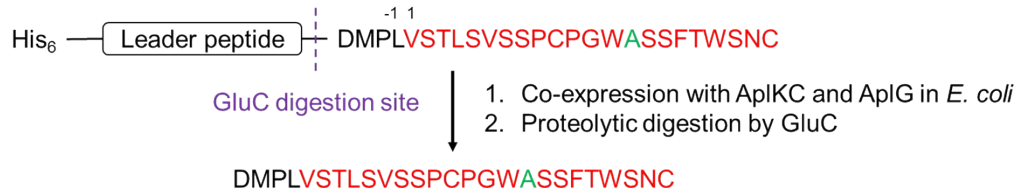

B) MALDI-TOF MS analysis of the digestion products

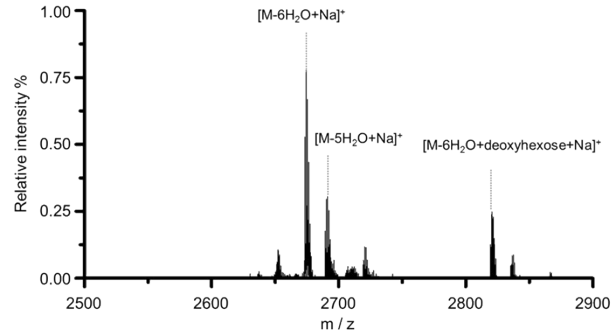

**Figure S18.** Co-expression of AplA<sub>P14A</sub>, AplKC and AplG in *E. coli*. A) His<sub>6</sub>-tagged AplA<sub>P14A</sub> was co-expressed with AplKC and AplG in *E. coli*, purified and digested by GluC. The reaction mixture was subjected to MALDI-TOF MS analysis. Reaction conditions: 50 mM Tris HCl, pH 8.0, 100 μM AplA<sub>P14A</sub> and 1 μM GluC at 37 °C for 12 h. B) MALDI-TOF MS analysis of the AplKC modified AplA<sub>P14A</sub> after GluC digestion. Deconvoluted mass of three derivatives: [M-6H<sub>2</sub>O+Na]<sup>+</sup>, calc. 2673.1243, obs. 2673.4000; [M-5H<sub>2</sub>O+Na]<sup>+</sup>, calc. 2691.1349, obs. 2691.4020. [M-6H<sub>2</sub>O+deoxyhexose+Na]<sup>+</sup>, calc. 2819.1825, obs. 2819.4970.

A) Co-expression of AplA<sub>P11A-P14A</sub> with AplKC and AplG in *E. coli*

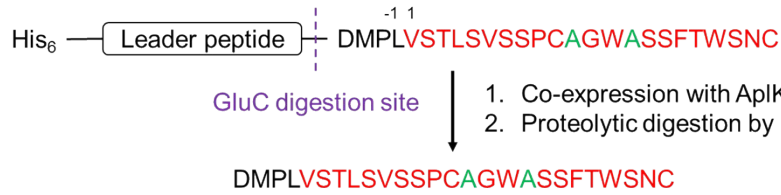

1. Co-expression with AplKC and AplG in *E. coli*
2. Proteolytic digestion by GluC

B) MALDI-TOF MS analysis of the digestion products

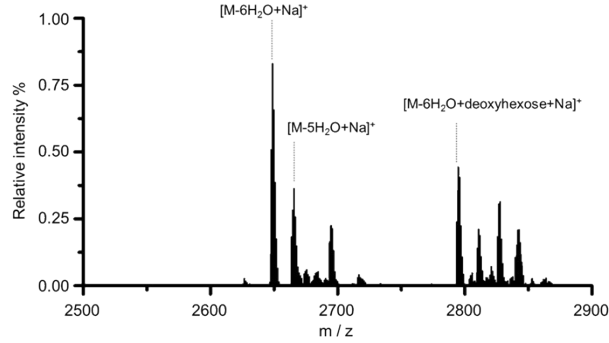

**Figure S19.** Co-expression of AplA<sub>P11A-P14A</sub> with AplKC and AplG in *E. coli*. A) His<sub>6</sub>-tagged AplA<sub>P11A-P14A</sub> was co-expressed with AplKC and AplG in *E. coli*, purified and digested by GluC. The reaction mixture was subjected to MALDI-TOF MS analysis. Reaction conditions: 50 mM Tris HCl, pH 8.0, 100 μM AplA<sub>P11A-P14A</sub> and 1 μM GluC at 37 °C for 12 h. B) MALDI-TOF MS analysis of the AplKC modified AplA<sub>P11A-P14A</sub> after GluC digestion. Deconvoluted mass of three derivatives: [M-6H<sub>2</sub>O+Na]<sup>+</sup>, calc. 2647.1086, obs. 2647.7176; [M-5H<sub>2</sub>O+Na]<sup>+</sup>, calc. 2665.1192, obs. 2665.6950. [M-6H<sub>2</sub>O+deoxyhexose+Na]<sup>+</sup>, calc. 2793.1668, obs. 2693.8400.

A) Co-expression of AplA<sub>W13C</sub> with AplKC and AplG in *E. coli*

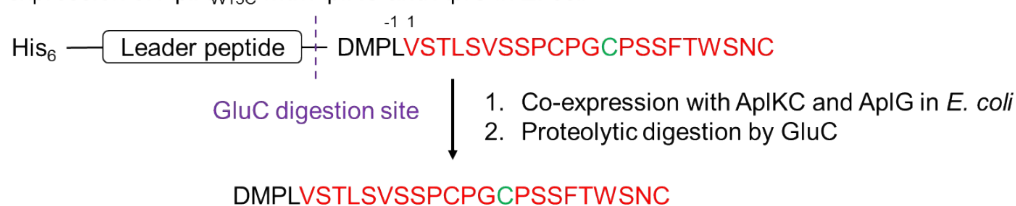

B) MALDI-TOF MS analysis of the digestion products

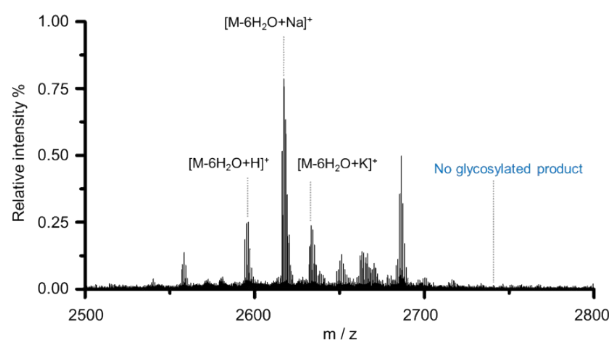

**Figure S20.** Co-expression of AplA<sub>W13C</sub> with AplKC and AplG in *E. coli*. A) His<sub>6</sub>-tagged AplA<sub>W13C</sub> was co-expressed with AplKC and AplG in *E. coli*, purified and digested by GluC. The reaction mixture was subjected to MALDI-TOF MS analysis. Reaction conditions: 50 mM Tris HCl, pH 8.0, 100 μM AplA<sub>W13C</sub> and 1 μM GluC at 37 °C for 12 h. B) MALDI-TOF MS analysis of the AplKC modified AplA<sub>W13C</sub> after GluC digestion. Deconvoluted mass of three derivatives: [M-6H<sub>2</sub>O+H]<sup>+</sup>, calc. 2594.0898, obs. 2594.2400; [M-6H<sub>2</sub>O+Na]<sup>+</sup>, calc. 2616.0796, obs. 2616.2440. [M-6H<sub>2</sub>O+K]<sup>+</sup>, calc. 2632.0536, obs. 2632.2130.

A) Co-expression of AplA<sub>W13E</sub> with AplKC and AplG in *E. coli*

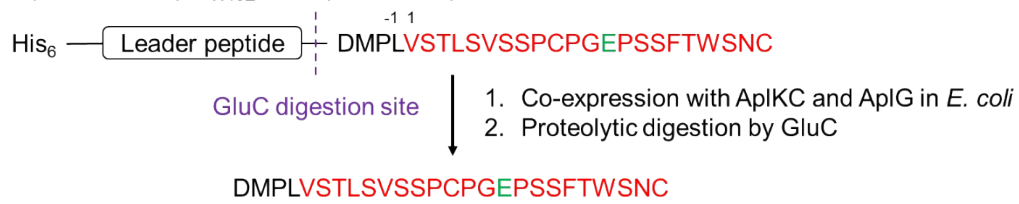

B) MALDI-TOF MS analysis of the digestion products

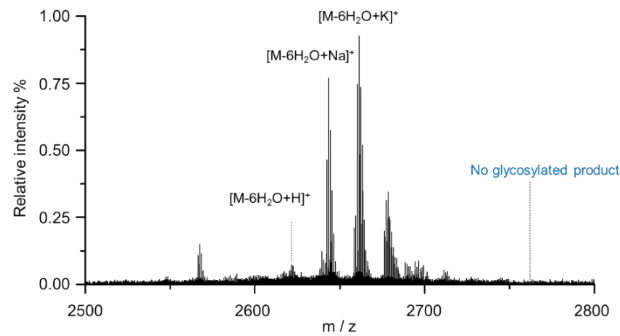

**Figure S21.** Co-expression of AplA<sub>W13E</sub> with AplKC and AplG in *E. coli*. A) His<sub>6</sub>-tagged AplA<sub>W13E</sub> was co-expressed with AplKC and AplG in *E. coli*, purified and digested by GluC. The reaction mixture was subjected to MALDI-TOF MS analysis. Reaction conditions: 50 mM Tris HCl, pH 8.0, 100 μM AplA<sub>W13E</sub> and 1 μM GluC at 37 °C for 12 h. B) MALDI-TOF MS analysis of the AplKC modified AplA<sub>W13E</sub> after GluC digestion. Deconvoluted mass of three derivatives: [M-6H<sub>2</sub>O+H]<sup>+</sup>, calc. 2620.1232, obs. 2620.4950; [M-6H<sub>2</sub>O+Na]<sup>+</sup>, calc. 2642.1130, obs. 2642.1080. [M-6H<sub>2</sub>O+K]<sup>+</sup>, calc. 2658.1130, obs. 2658.3410.

A) Co-expression of AplA<sub>W13R</sub> with AplKC and AplG in *E. coli*

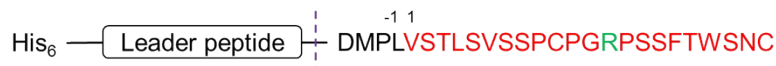

GluC digestion site

1. Co-expression with AplKC and AplG in *E. coli*
2. Proteolytic digestion by GluC

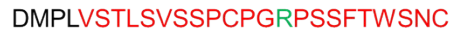

B) MALDI-TOF MS analysis of the digestion products

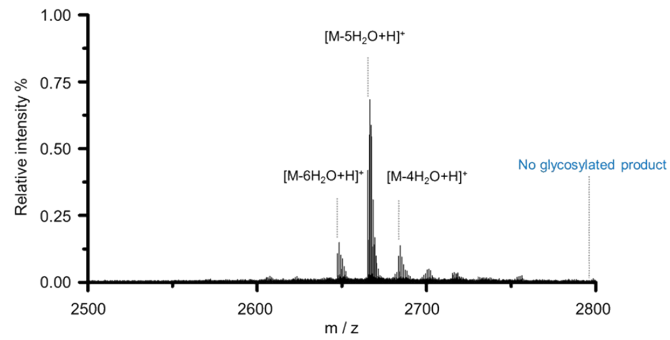

**Figure S22.** Co-expression of AplA<sub>W13R</sub> with AplKC and AplG in *E. coli*. A) His<sub>6</sub>-tagged AplA<sub>W13R</sub> was co-expressed with AplKC and AplG in *E. coli*, purified and digested by GluC. The reaction mixture was subjected to MALDI-TOF MS analysis. Reaction conditions: 50 mM Tris HCl, pH 8.0, 100 μM AplA<sub>W13R</sub> and 1 μM GluC at 37 °C for 12 h. B) MALDI-TOF MS analysis of the AplKC modified AplA<sub>W13R</sub> after GluC digestion. Deconvoluted mass of three derivatives: [M-6H<sub>2</sub>O+H]<sup>+</sup>, calc. 2647.1817, obs. 2647.4100; [M-5H<sub>2</sub>O+H]<sup>+</sup>, calc. 2665.1923, obs. 2665.4180. [M-4H<sub>2</sub>O+H]<sup>+</sup>, calc. 2683.2080, obs. 2683.4280.

A) Co-expression of AplA<sub>W13S</sub> with AplKC and AplG in *E. coli*

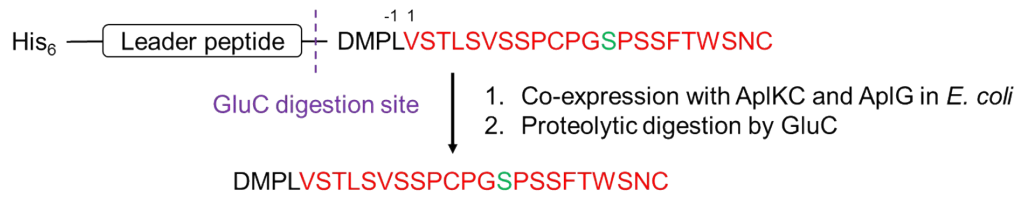

B) MALDI-TOF MS analysis of the digestion products

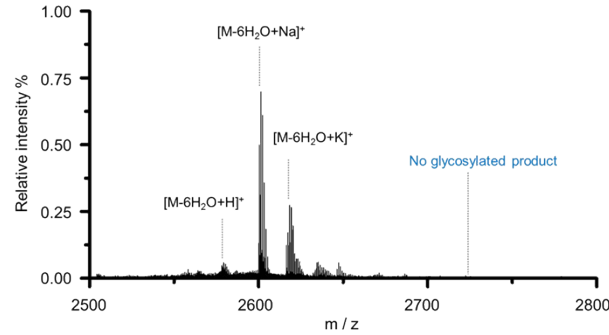

**Figure S23.** Co-expression of AplA<sub>W13S</sub> with AplKC and AplG in *E. coli*. A) His<sub>6</sub>-tagged AplA<sub>W13S</sub> was co-expressed with AplKC and AplG in *E. coli*, purified and digested by GluC. The reaction mixture was subjected to MALDI-TOF MS analysis. Reaction conditions: 50 mM Tris HCl, pH 8.0, 100 μM AplA<sub>W13S</sub> and 1 μM GluC at 37 °C for 12 h. B) MALDI-TOF MS analysis of the AplKC modified AplA<sub>W13S</sub> after GluC digestion. Deconvoluted mass of three derivatives: [M-6H<sub>2</sub>O+H]<sup>+</sup>, calc. 2578.1127, obs. 2578.2940; [M-6H<sub>2</sub>O+Na]<sup>+</sup>, calc. 2600.1025, obs. 2600.3460. [M-6H<sub>2</sub>O+K]<sup>+</sup>, calc. 2616.1025, obs. 2616.2910.

A) Co-expression of AplA<sub>P11W-W13A</sub> with AplKC and AplG in *E. coli*

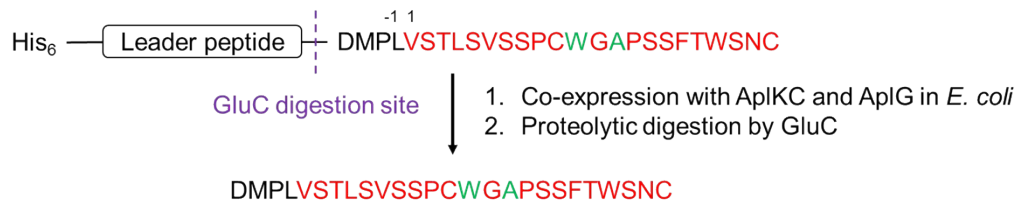

B) LC-MS analysis of the digestion products

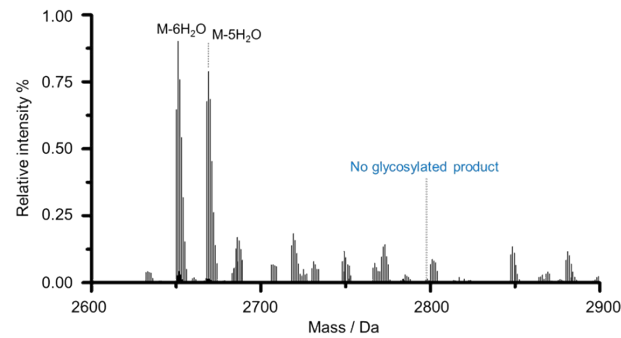

C) LC-MS/MS analysis of the [M-6H<sub>2</sub>O] segment

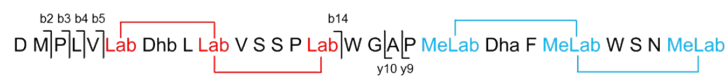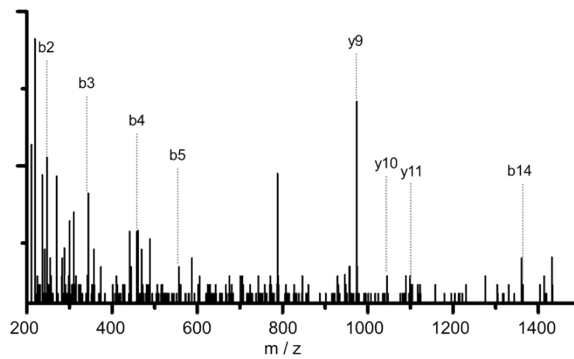

| Species | Predicted Mass / Da | Observed Mass / Da | Error / ppm | Species | Predicted Mass / Da | Observed Mass / Da | Error / ppm |
|---------|---------------------|--------------------|-------------|---------|---------------------|--------------------|-------------|
| b2      | 247.07475           | 247.07497          | 0.9         | b14     | 1363.6385           | 1363.6410          | 1.8         |
| b3      | 344.12751           | 344.12780          | 0.8         | y9      | 974.38257           | 974.37663          | 6.1         |
| b4      | 457.21158           | 457.21326          | 3.7         | y10     | 1045.4197           | 1045.4237          | 3.8         |
| b5      | 556.27999           | 556.28217          | 3.9         |         |                     |                    |             |

**Figure S24.** Co-expression of AplA<sub>P11W-W13A</sub> with AplKC and AplG in *E. coli*. A) His<sub>6</sub>-tagged AplA<sub>P11W-W13A</sub> was co-expressed with AplKC and AplG in *E. coli*, purified and digested by GluC. The reaction mixture was subjected to LC-MS analysis. Reaction conditions: 50 mM Tris HCl, pH 8.0, 100 μM AplA<sub>P11W-W13A</sub> and 1 μM GluC at 37 °C for 12 h. B) LC-MS analysis of the AplKC, AplG modified AplA<sub>P11W-W13A</sub> after GluC digestion. Deconvoluted mass of two derivatives: [M-6H<sub>2</sub>O], calc. 2650.1443, obs. 2650.1402; [M-5H<sub>2</sub>O], calc. 2668.1549, obs. 2668.1508. C) LC-MS/MS analysis of the [M-6H<sub>2</sub>O] segment. The *b* and *y* ions are listed in the table and marked in the spectrum. The amino acid sequence of the peptide is shown on top.

A) Co-expression of AplA<sub>P11insAAA</sub> with AplKC and AplG in *E. coli*

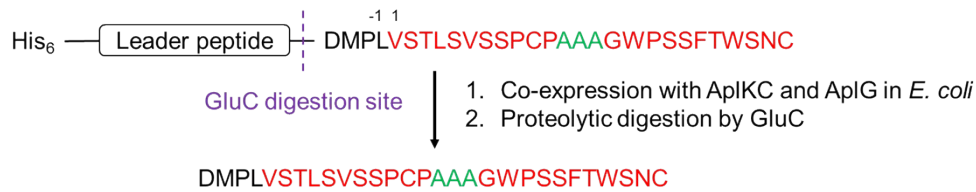

B) LC-MS analysis of the digestion products

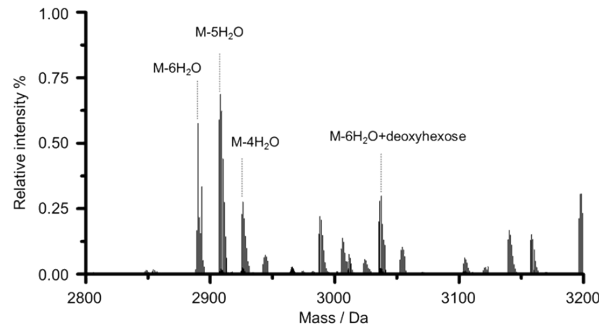

C) LC-MS/MS analysis of the [M-6H<sub>2</sub>O+deoxyhexose] segment

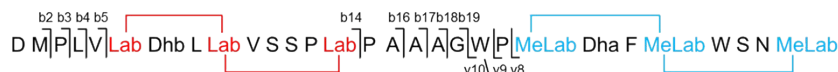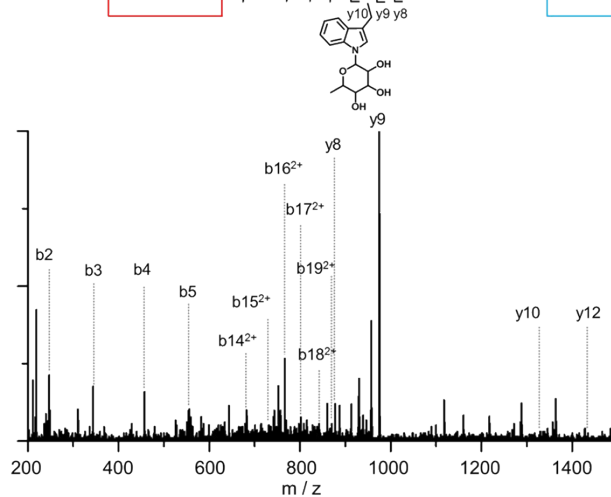

| Species | Predicted Mass / Da | Observed Mass / Da | Error / ppm | Species           | Predicted Mass / Da | Observed Mass / Da | Error / ppm |
|---------|---------------------|--------------------|-------------|-------------------|---------------------|--------------------|-------------|
| b2      | 247.07475           | 247.07450          | 1.0         | b14 <sup>2+</sup> | 682.32292           | 682.32268          | 0.4         |
| b3      | 344.12751           | 344.12757          | 0.2         | b16 <sup>2+</sup> | 766.36786           | 766.37090          | 4.0         |
| b5      | 556.27999           | 556.27865          | 2.4         | b17 <sup>2+</sup> | 801.88642           | 801.88732          | 1.1         |
| y8      | 877.32981           | 877.33054          | 0.8         | b18 <sup>2+</sup> | 837.40498           | 837.40511          | 0.2         |
| y9      | 974.38257           | 974.38820          | 5.8         | b19 <sup>2+</sup> | 865.91571           | 865.91067          | 5.8         |
| y10     | 1306.5198           | 1306.5170          | 2.1         |                   |                     |                    |             |

**Figure S25.** Co-expression of AplA<sub>P11insAAA</sub> with AplKC and AplG in *E. coli*. A) His<sub>6</sub>-tagged AplA<sub>P11insAAA</sub> was co-expressed with AplKC and AplG in *E. coli*, purified and digested by GluC. The reaction mixture was subjected to LC-MS analysis. Reaction conditions: 50 mM Tris HCl, pH 8.0, 100 μM AplA<sub>P11insAAA</sub> and 1 μM GluC at 37 °C for 12 h. B) LC-MS analysis of the AplKC, AplG modified AplA<sub>P11insAAA</sub> after GluC digestion. Deconvoluted mass of four derivatives: [M-6H<sub>2</sub>O], calc. 2889.2713, obs. 2889.2878; [M-5H<sub>2</sub>O], calc. 2907.2819, obs. 2907.3003; [M-4H<sub>2</sub>O], calc. 2925.2925, obs. 2925.3103; [M-6H<sub>2</sub>O+deoxyhexose], calc. 3035.3293, obs. 3035.3465. C) LC-MS/MS analysis of the [M-6H<sub>2</sub>O+deoxyhexose] segment. The *b* and *y* ions are listed in the table and marked in the spectrum. The amino acid sequence of the peptide is shown on top.





A) Co-expression of AplA<sub>P11insW</sub> with AplKC and AplG in *E. coli*

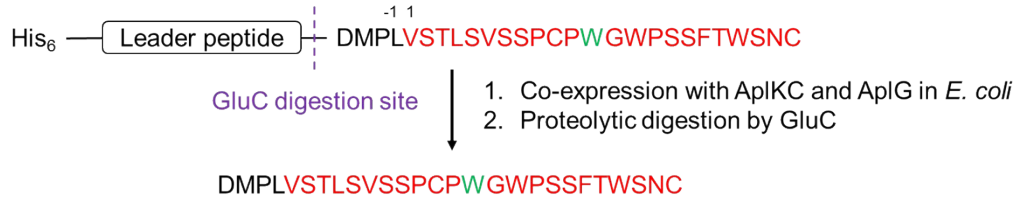

B) LC-MS analysis of the digestion products

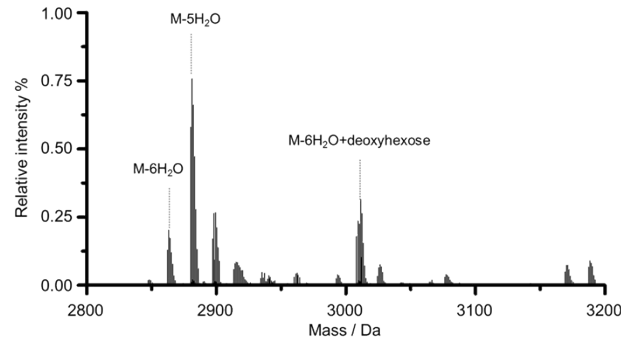

C) LC-MS/MS analysis of the [M-6H<sub>2</sub>O+deoxyhexose] segment

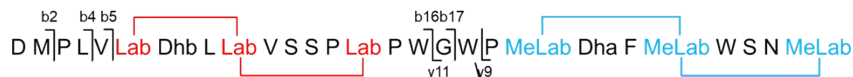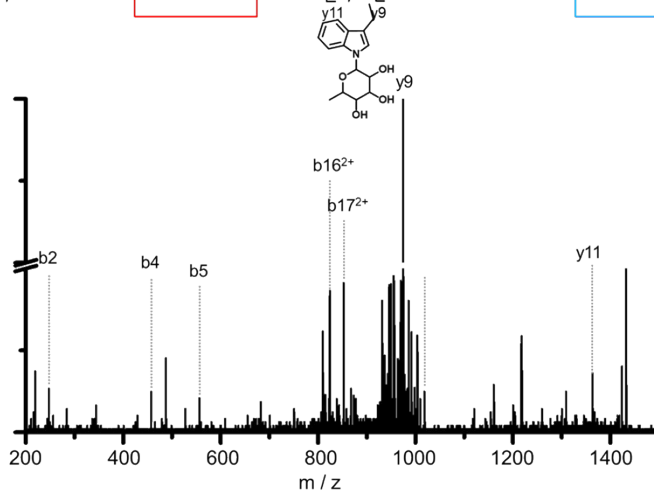

| Species | Predicted Mass / Da | Observed Mass / Da | Error / ppm | Species           | Predicted Mass / Da | Observed Mass / Da | Error / ppm |
|---------|---------------------|--------------------|-------------|-------------------|---------------------|--------------------|-------------|
| b2      | 247.07475           | 247.07451          | 1.0         | y11               | 1363.5413           | 1363.5415          | 0.1         |
| b4      | 457.21158           | 457.21232          | 1.6         | b16 <sup>2+</sup> | 823.88896           | 823.89054          | 1.9         |
| b5      | 556.27999           | 556.28235          | 4.2         | b17 <sup>2+</sup> | 852.39969           | 852.40423          | 5.3         |
| y9      | 974.38257           | 974.38663          | 4.2         |                   |                     |                    |             |

**Figure S27.** Co-expression of AplA<sub>P11insW</sub> with AplKC and AplG in *E. coli*. A) His<sub>6</sub>-tagged AplA<sub>P11insW</sub> was co-expressed with AplKC and AplG in *E. coli*, purified and digested by GluC. The reaction mixture was subjected to LC-MS analysis. Reaction conditions: 50 mM Tris HCl, pH 8.0, 100 μM AplA<sub>P11insW</sub> and 1 μM GluC at 37 °C for 12 h. B) LC-MS analysis of the AplKC, AplG modified AplA<sub>P11insW</sub> after GluC digestion. Deconvoluted mass of three derivatives: [M-6H<sub>2</sub>O], calc. 2862.2392, obs. 2862.2451; [M-5H<sub>2</sub>O], calc. 2880.2498, obs. 2880.2545; [M-6H<sub>2</sub>O+deoxyhexose], calc. 3008.2972, obs. 3008.3038. C) LC-MS/MS analysis of the [M-6H<sub>2</sub>O+deoxyhexose] segment. The *b* and *y* ions are listed in the table and marked in the spectrum. The amino acid sequence of the peptide is shown on top.



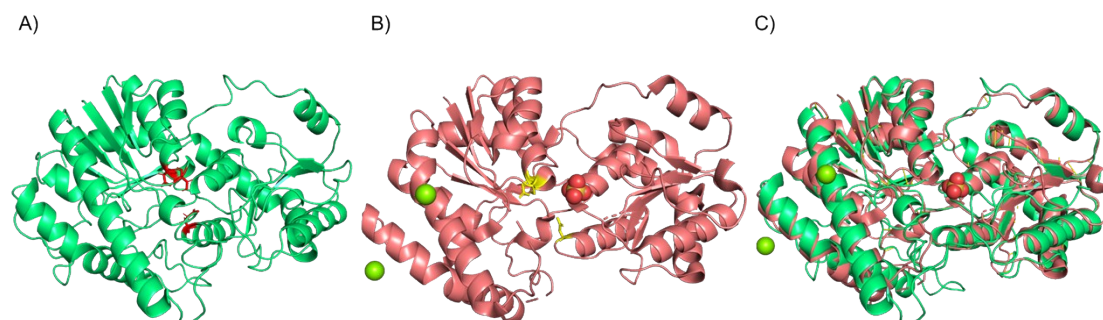

**Figure S28.** Predicted structure of AplG, crystal structure of GtfB and overlay of these two structures. A) Predicted structure of AplG using I-TASSER. Residues S10, D13 and E358 were marked in red. B) Crystal structure of GtfB (PDB:1IIR). Active site residues S10, D13 and D332 were marked in yellow. Green spheres are magnesium ion. Sulfate ion is in the center of the protein. C) Structural overlay of AplG and GtfB.

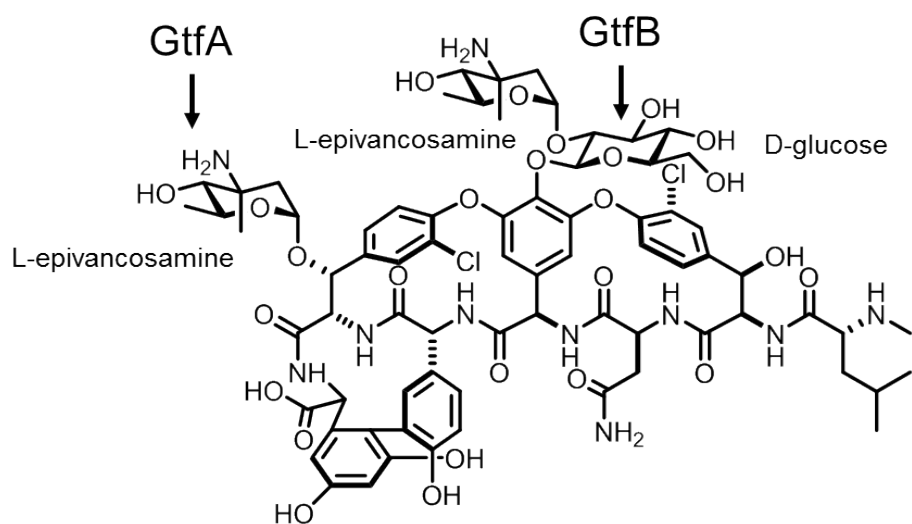

**Figure S29.** Structure of chloroeremomycin and the roles of GtfA and GtfB. GtfA catalyzes the addition of 4-*epi*-vancosamine to the desvancosaminyl vancomycin substrate. GtfB transfers the glucose moiety to the vancomycin aglycone acceptor.

```

      ★  ★
GtfA (1) MRVLIITGCGSRGDTTEPLVALAARLRELGADARMCLPPDYVERCAEVGVPMVPVGR-----
GtfB (1) MRVLLATCGSRGDTTEPLVALAVRVRDLGADVRCAPPDCAERLAEVGVPHVPVGP-----
AplG (1) MRVLLYCYGSRGDTVQPYAALAAGLVRAHRATLVAPGRFGSLATAHGAGFAALDSGLLDD
      S10 D13
GtfA (56) -----AVRAGAREPG-ELPPGAAEVVTEVVAEWFDKVPAIEGCDAVVTTGLLP
GtfB (56) -----SARAPIQRAKPLTAEDVRRFTTEAIATQFDEIPAAAEGCAAVVTTGLLA
AplG (61) LDLPEVQAMYLRDDRPTAEAKRTALMLRGEYHRLYPVLLREAWAAAADGADLVLFSS--QS

GtfA (104) AAVAVRSMAEKLGIPIRYTVLSPDHLPSQSQ-----AERDMYNQGA
GtfB (105) AAIGVRSVAEKLGIPIFYAFHCPSYVPSYPPPLGEPSTQDTID--IPAQWERNNOQA
AplG (119) NAEAMHQIPERLGVPGVLTVLYPFYVPSRHPSTLLGSLGTAPRTLNRSLHALARRRPA

GtfA (146) DRLEFGDAVNSHRASIGLPPVEHLYDYGYTDQP-----WLAADPVLSPLRPTDLGTVQTG
GtfB (163) YQRYGGLLSHRDAIGLPPVEDIFTFGYTDHP-----WVAADPVLAPLQPTDLDAVQTG
AplG (179) PEVAAAAAARWTDTLGLAERPGALDYRRDPGGRPRPVLHGFSRQILPPAPDWPDTVHTLG

GtfA (200) AWILPDERPLSA--ELEAFLAAGSTPVYVGFSSSRPATADAAKMAIKAVRASGRRIVLS
GtfB (217) AWILPDERPLSP--ELAAFLDAGPPPVLGFGSLG--APADAVRVAIDAIRAHGRRVLS
AplG (239) AWQLPVDPAWQPSRELTDFLAAGPPPLAVGFGSLVGTDPKAAGRHVAAAIRATGHRAVVV

GtfA (258) RGWADLVLPDDGADCFVVEVNLQELFGRVAAAIIHDSAGTLLAMRAGIPQIVVRRVV★
GtfB (273) RGWADLVLPDDGADCFVVEVNLQELFGRVAAVHHGGAGTTHVAARAGAPQILLPQMA★
AplG (299) TGWGGISIPDPPPEILVTSVDPYEWLLPRARLAVHAGGTGTLHTATAAGLPQVACPFHRE
      E358
GtfA (318) NVVEQAYHADRVAELGVG--VAVDGPVPTIDSLSAALDTALAPEIRARATTVADTIRADG
GtfB (333) ----QPYAGRVAELGVG--VAHDGPIPTFDSLAAALATLTPETHARATAVAGTIRTDG
AplG (359) ----QAQWSRRLHRLGVAPAPLHQRDLSADRLAAAIRAADTEPRYRTRARVLAAAMRTEG

GtfA (376) TTVAQAQLLFDVAVSLEKPTVPA
GtfB (387) AAVAARLLLDVAVSREKPTVSA
AplG (415) GVPVAVVEVLERLVHR-----

```

**Figure S30.** Sequence alignment of AplG with GtfA and GtfB. The accession numbers of protein in GenBank are listed as follows: AplG (AHB63595.1), GtfA (AAB49292.1), GtfB (AAB49293.1). Cyan star indicates the amino acid that may bind the reactive hydroxyl group of vancomycin aglycon substrate. Red star indicates the amino acids that may as a catalytic base.

A) Co-expression of AplA with AplG<sub>S10A-D13A</sub> in *E. coli*

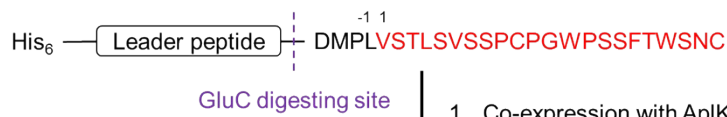

1. Co-expression with AplKC and AplG<sub>S10A-D13A</sub> in *E. coli*
2. Proteolytic digestion by GluC

B) LC-MS analysis of the digestion products

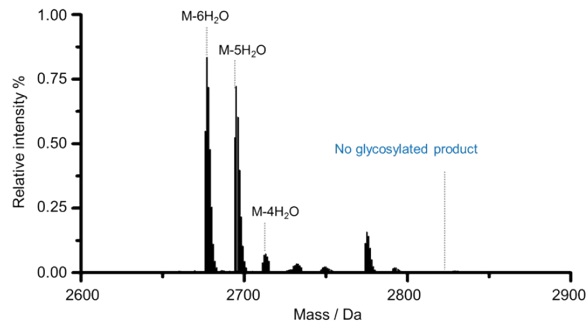

**Figure S31.** Co-expression of AplA with AplKC and AplG<sub>S10A-D13A</sub> in *E. coli*. A) His<sub>6</sub>-tagged AplA was co-expressed with AplKC and AplG<sub>S10A-D13A</sub> in *E. coli*, purified and digested by GluC. The reaction mixture was subjected to MALDI-TOF MS analysis. Reaction conditions: 50 mM Tris HCl, pH 8.0, 100 μM AplA and 1 μM GluC at 37 °C for 12 h. B) MALDI-TOF MS analysis of the AplKC modified AplA after GluC digestion. Deconvoluted mass of three derivatives: [M-6H<sub>2</sub>O], calc. 2676.1672, obs. 2676.1530; [M-5H<sub>2</sub>O], calc. 2694.1778, obs. 2694.1628. [M-4H<sub>2</sub>O], calc. 2712.1884, obs. 2712.1594.

A) Co-expression of AplA with AplG<sub>E358A</sub> in *E. coli*

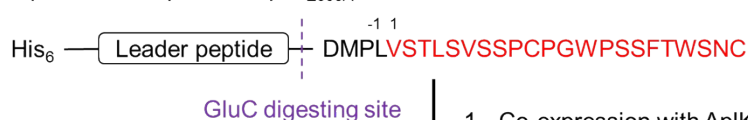

1. Co-expression with AplKC and AplG<sub>E358A</sub> in *E. coli*
2. Proteolytic digestion by GluC

B) LC-MS analysis of the digestion products

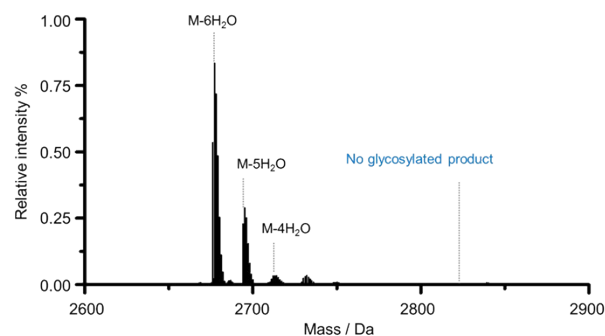

**Figure S32.** Co-expression of AplA with AplKC and AplG<sub>E358A</sub> in *E. coli*. A) His<sub>6</sub>-tagged AplA was co-expressed with AplKC and AplG<sub>E358A</sub> in *E. coli*, purified and digested by GluC. The reaction mixture was subjected to MALDI-TOF MS analysis. Reaction conditions: 50 mM Tris HCl, pH 8.0, 100 μM AplA and 1 μM GluC at 37 °C for 12 h. B) MALDI-TOF MS analysis of the AplKC modified AplA after GluC digestion. Deconvoluted mass of three derivatives: [M-6H<sub>2</sub>O], calc. 2676.1672, obs. 2676.1655; [M-5H<sub>2</sub>O], calc. 2694.1778, obs. 2694.1726. [M-4H<sub>2</sub>O], calc. 2712.1884, obs. 2712.1658.
